## **Intratumoral delivery of engineered recombinant modified vaccinia virus Ankara expressing Flt3L and OX40L generates potent antitumor immunity through activating the cGAS/STING pathway and depleting tumor-infiltrating regulatory T cells**

Ning Yang<sup>1#</sup>, Yi Wang<sup>1#</sup>, Shuaitong Liu<sup>1</sup>, Joseph M. Luna<sup>3</sup>, Gregory Mazo<sup>1</sup>, Adrian Y. Tan<sup>4</sup>, Tuo Zhang<sup>4</sup>, Jiahu Wang<sup>5</sup>, Wei Yan<sup>6</sup>, John Choi<sup>6</sup>, Anthony Rossi<sup>1,2</sup>, Jenny Zhaoying Xiang<sup>4</sup>, Charles M. Rice<sup>3</sup>, Taha Merghoub<sup>2,7,8</sup>, Jedd D. Wolchok<sup>2,7,8</sup>, and Liang Deng<sup>1,2,8\*</sup>

<sup>1</sup>Dermatology Service, Department of Medicine, Memorial Sloan Kettering Cancer Center, New York, NY 10065, USA.

<sup>2</sup>Weill Cornell Medical College, New York, NY 10065

<sup>3</sup>The Laboratory of Virology and Infectious Disease, The Rockefeller University, New York, NY, 10065, USA.

<sup>4</sup>Genomic Resources Core Facility, Weill Cornell Medical College, New York, NY, 10065, USA

<sup>5</sup>Genvira Biosciences, Ottawa, ON K1V 1C1, Canada

<sup>6</sup>IMVAQ Therapeutics, Sammamish, WA, 98021, USA

<sup>7</sup>Immuno-oncology service, Human Oncology and Pathogenesis Program; Memorial Sloan Kettering Cancer Center, New York, NY 10065, USA

<sup>8</sup>Parker Institute for Cancer Immunotherapy, Memorial Sloan Kettering Cancer Center, New York, NY, USA

\*corresponding author. Mailing address for Liang Deng: Dermatology Service, Department of Medicine, Memorial Sloan Kettering Cancer Center, 1275 York Ave., New York, NY 10065.

Email: [dengl@mskcc.org](mailto:dengl@mskcc.org). # These two authors contributed equally to this work.

**One Sentence Summary:** Intratumoral delivery of recombinant MVA for cancer immunotherapy

## 1 **Summary**

2 Intratumoral (IT) delivery of immune-activating viruses can serve as an important strategy to turn  
3 “cold” tumors into “hot” tumors, resulting in overcoming resistance to immune checkpoint block-  
4 ade (ICB). Modified vaccinia virus Ankara (MVA) is a highly attenuated, non-replicative vaccinia  
5 virus that has a long history of human use. Here we report that IT recombinant MVA (rMVA),  
6 lacking E5R encoding an inhibitor of the DNA sensor cyclic GMP-AMP synthase (cGAS), ex-  
7 pressing a dendritic cell growth factor, Fms-like tyrosine kinase 3 ligand (Flt3L), and a T cell co-  
8 stimulator, OX40L, generates strong antitumor immunity, which is dependent on CD8<sup>+</sup> T cells, the  
9 cGAS/STING-mediated cytosolic DNA-sensing pathway, and STAT1/STAT2-mediated type I  
10 IFN signaling. Remarkably, IT rMVA depletes OX40<sup>hi</sup> regulatory T cells via OX40L/OX40 inter-  
11 action and IFNAR signaling. Taken together, our study provides a proof-of-concept for improving  
12 MVA-based cancer immunotherapy, through modulation of both innate and adaptive immunity.

## 13 **Keywords**

14 Cytosolic DNA-sensing pathway, innate immunity, regulatory T cells, modified vaccinia virus  
15 Ankara, tumor immune-suppressive microenvironment, dendritic cells, myeloid cells, CD8<sup>+</sup> cy-  
16 totoxic T cells, type I IFN, IFNAR, OX40, and immune checkpoint blockade (ICB).

## 17 **Introduction**

18 Immune checkpoint blockade (ICB) therapy utilizing antibodies targeting T cell inhibitory mech-  
19 anisms has revolutionized how solid tumors are treated (Ribas and Wolchok, 2018; Wei et al.,  
20 2018; Zou et al., 2016). However, the majority of patients without pre-existing antitumor T cell  
21 responses do not respond to ICB therapy and one-third of the initial responders develop acquired  
22 resistance to this line of therapy likely due to cancer immuno-editing (Ribas and Wolchok, 2018;  
23 Schreiber et al., 2011; Zaretsky et al., 2016). Therefore, innovative approaches to rendering tumors  
24 sensitive to ICB therapy are urgently needed.

25  
26 Viral-based cancer immunotherapy is a versatile and effective approach to alter tumor immuno-  
27 suppressive microenvironment (TME) through multiple mechanisms, including the induction of  
28 innate immunity, immunogenic cell death in the infected immune and tumor cells, and activation  
29 of tumor-infiltrating dendritic cells (DCs), and antitumor CD8 and CD4 T cells, as well as deple-  
30 tion of immunosuppressive cells (Bommareddy et al., 2018; Davola and Mossman, 2019; Lemos  
31 de Matos et al., 2020; Russell et al., 2012; Workenhe and Mossman, 2014). As a result, intra-  
32 tumoral (IT) delivery of immunogenic viruses turns “cold” tumors into “hot” tumors, which ren-  
33 ders them sensitive to other immunotherapeutic modalities including ICB (Chesney et al., 2018;  
34 Dai et al., 2017; Ribas et al., 2018; Wang et al., 2021; Zamarin et al., 2014).

35  
36 Poxviruses are large cytoplasmic DNA viruses. Modified vaccinia virus Ankara (MVA) is a highly  
37 attenuated vaccinia virus that has been used extensively as a vaccine vector (Gilbert, 2013; Liu et  
38 al., 2021; Volz and Sutter, 2017). MVA infection of dendritic cells induces type I IFN via the  
39 cytosolic DNA-sensing pathway mediated by the DNA sensor cyclic GMP-AMP synthase (cGAS)  
40 and downstream signaling molecules such as STimulator of INterferon Genes (STING) (Dai et al.,  
41 2014). However, MVA encodes multiple inhibitors of the nucleic acid-sensing pathways. IT heat-  
42 inactivated MVA (Heat-iMVA) generates stronger antitumor immunity than IT live MVA, which  
43 requires CD8<sup>+</sup> T cells, Batf3-dependent CD103<sup>+</sup>/CD8 $\alpha$  cross-presenting dendritic cells (DCs), and  
44 STING-mediated cytosolic DNA-sensing pathway (Dai et al., 2017).

45

46 We designed our recombinant MVA virus to engage both innate and adaptive immunity in the  
47 tumor microenvironment. First, given the importance of the cGAS/STING pathway in innate im-  
48 mune-sensing of MVA and MVA-induced antitumor immunity (Dai et al., 2017; Deng et al., 2014;  
49 Woo et al., 2014), we deleted the E5R gene, encoding a cGAS inhibitor, from the MVA genome  
50 to generate MVA $\Delta$ E5R, which induces much higher levels of type I IFN compared with MVA  
51 (Yang et al., 2021). Second, we engineered the virus to express two membrane-anchored  
52 transgenes, FMS-like tyrosine kinase 3 ligand (Flt3L) and OX40L. Flt3L is a growth factor for  
53 CD103<sup>+</sup> DCs and plasmacytoid DCs (Liu and Nussenzweig, 2010). OX40L is a co-stimulatory  
54 ligand for OX40, a member of the tumor necrosis factor (TNF) receptor superfamily expressed on  
55 activated CD4 and CD8 T cells as well as regulatory T cells (Croft, 2009). Here we used rMVA  
56 to designate MVA $\Delta$ E5R-hFlt3L-mOX40L, which expresses human Flt3L and murine OX40L, and  
57 rhMVA to designate MVA $\Delta$ E5R-hFlt3L-hOX40L, which expresses human Flt3L and human  
58 OX40L.

59  
60 We observed that IT rMVA induces strong antitumor effects via the cGAS/STING-mediated  
61 DNA-sensing mechanism and the IFNAR/STAT1/STAT2 pathway. Depletion of CD8<sup>+</sup> T cells  
62 renders tumors resistant to rMVA therapy. IT rMVA dramatically reduces OX40<sup>hi</sup> regulatory T  
63 cells (Tregs) in the injected tumors via OX40L/OX40 interaction and IFNAR signaling. Taken  
64 together, our study strongly supports that rational engineering of MVA is an innovative strategy  
65 to deplete intratumoral OX40<sup>hi</sup> Tregs to enhance antitumor immunity.

## 66 **Results**

67 **The rationale for engineering a recombinant MVA virus (rMVA) with deletion of E5R and**  
68 **expression of human FMS-like tyrosine kinase 3 ligand (hFlt3L) and murine OX40L**  
69 **(mOX40L) for cancer immunotherapy.** Our previous work demonstrated that Batf3-dependent  
70 CD103<sup>+</sup> DCs are required for antitumor immunity induced by intratumoral (IT) delivery of heat-  
71 inactivated modified vaccinia virus Ankara (Dai et al., 2017). Flt3L is a growth factor that is im-  
72 portant for DC development, especially for CD103<sup>+</sup> DCs and plasmacytoid DCs (Liu and  
73 Nussenzweig, 2010). To investigate whether human Flt3L (hFlt3L) expression on tumor cells af-  
74 fects tumor growth and tumor-infiltrating myeloid cell populations, we constructed a murine mel-  
75 anoma B16-F10 stable cell line that expresses membrane-bound hFlt3L, and subsequently im-  
76 planted either B16-F10-hFlt3L or the parental B16-F10 cells into WT C57BL/6J mice (**Figure**  
77 **S1A**). We observed that expressing hFlt3L on tumor cells delayed B16-F10 tumor growth and  
78 prolonged the survival of tumor-bearing mice (**Figure S1B and S1C**). The percentages of CD103<sup>+</sup>  
79 DCs out of CD45<sup>+</sup> cells, as well as the absolute numbers of CD103<sup>+</sup> DCs per gram of B16-F10-  
80 hFlt3L, were increased in B16-F10-hFlt3L tumors compared with B16-F10 control tumors,  
81 whereas CD11b<sup>+</sup> DCs were at similar levels in both tumors (**Figure S1D**). These results indicate  
82 that hFlt3L expression on tumor cell surfaces facilitates the development and proliferation of  
83 CD103<sup>+</sup> DCs in the tumor microenvironment.

84  
85 OX40L is a costimulatory molecule that interacts with its receptor OX40 expressed on T cells  
86 (Croft et al., 2009). OX40L on activated dendritic cells plays an important role in the generation  
87 of antigen-specific T cell responses (Murata et al., 2000). We constructed a B16-F10-mOX40L  
88 cell line that constitutively expresses murine OX40L on its surface (**Figure S1A**). B16-F10-  
89 mOX40L tumors grew slower than the parental B16-F10 tumors after implantation (**Figure S1B**  
90 **and S1C**), with higher percentages of Granzyme B<sup>+</sup> CD8<sup>+</sup> T cells compared with the parental B16-  
91 F10 cells (**Figure S1E**). The median survival of mice implanted with B16-F10-hFlt3L or B16-  
92 F10-mOX40L were 28 and 34 days, 8 or 14 days longer, respectively, than those implanted with  
93 the control B16-F10 (**Figure S1C**).

94  
95 We recently discovered that the vaccinia E5R gene encodes a potent inhibitor of cGAS (Yang et  
96 al., 2021). MVAΔE5R infection of murine bone marrow-derived dendritic cells (BMDCs) induces

97 much higher levels of IFN $\beta$  compared with MVA (**Figure S2A**). We compared the antitumor  
98 efficacy of MVA vs. MVA $\Delta$ E5R in the B16-F10 melanoma unilateral implantation model in vivo  
99 (**Figure S2B**) and found that IT MVA prolonged the median survival from 11 days in the PBS-  
100 treated group to 26 days, and IT MVA $\Delta$ E5R resulted in 60% survival (**Figure S2C**). We also  
101 designed the following recombinant MVA viruses to evaluate the utility of hFlt3L and mOX40L  
102 individually expressed by MVA $\Delta$ E5R (**Figure S2D**). MVA $\Delta$ E5R-hFlt3L and MVA $\Delta$ E5R-  
103 mOX40L expressed respective transgenes in infected BHK21 cells (**Figure S2E**). IT delivery of  
104 the two viruses resulted in higher numbers of IFN- $\gamma$ <sup>+</sup> T cells in the spleens compared with MVA  
105 or MVA $\Delta$ E5R, as determined by ELISPOT analysis (**Figure S2F and S2G**). These results suggest  
106 that expressing hFlt3L or mOX40L by recombinant MVA improves antitumor efficacy.

107  
108 Based on these results, we designed an rMVA (MVA $\Delta$ E5R-hFlt3L-mOX40L) by inserting two  
109 transgenes, a membrane-bound hFlt3L, and mOX40L into the E5R locus (**Figure 1A**). The hFlt3L  
110 and mOX40L are linked by a P2A self-cleaving sequence and their expression is driven by the  
111 vaccinia synthetic early/late promoter. We observed that both transgenes were expressed effi-  
112 ciently on the surface of infected B16-F10 murine melanoma cells and BMDCs at 24 h post-infec-  
113 tion (**Figure 1B**). rMVA infection of BMDCs induced the expression of *Ifnb*, *Ifna4*, *Ccl4*, *Ccl5*,  
114 *Cxcl9*, *Cxcl10*, and *Il12p40* genes. Infection of BMDCs with rMVA induced cGAS-dependent *Ifnb*  
115 gene expression and IFN- $\beta$  protein secretion at higher levels compared with MVA (**Figure 1C**  
116 **and 1D**). rMVA infection also induces DC maturation, as manifested by CD86 upregulation, de-  
117 termined by FACS, in a cGAS-dependent manner (**Figure 1E**).

118  
119 **Intratumoral injection (IT) of rMVA elicits strong antitumor immune responses that are**  
120 **dependent on cGAS-STING-mediated DNA sensing and STAT1/STAT2-mediated IFNAR-**  
121 **signaling pathway.** To test whether cGAS/STING and STAT1/STAT2 are important for IT  
122 rMVA-induced antitumor immunity, cGAS<sup>-/-</sup>, STING<sup>Gt/Gt</sup> (lacking function STING) (Sauer et al.,  
123 2011), STAT1<sup>-/-</sup>, STAT2<sup>-/-</sup> or age-matched WT C57BL/6J mice were implanted with B16-F10  
124 melanoma intradermally. When the tumors were established, they were injected with rMVA twice  
125 weekly. Whereas IT rMVA resulted in tumor eradication or delayed tumor growth in WT mice,  
126 neither STAT1<sup>-/-</sup> or STAT2<sup>-/-</sup> mice responded to this therapy, with median survival of 15 and 12  
127 days, respectively, compared with 11 days in the mock-treated group (**Figure 1F and 1G**). IT

128 rMVA treatment of cGAS<sup>-/-</sup> or STING<sup>Gt/Gt</sup> mice extended median survival from 11 days in PBS  
129 control group to 18.5 days ( $p = 0.0002$ ). However, all of the cGAS<sup>-/-</sup> or STING<sup>Gt/Gt</sup> mice died from  
130 tumor progression (**Figure 1F and 1G**). These results demonstrated that activation of the cGAS-  
131 mediated cytosolic DNA-sensing pathway, as well as the IFNAR/STAT1/STAT2 signaling, by IT  
132 rMVA, is critical for the generation of antitumor immunity.

133

134 **IT rMVA results in myeloid cells influx into the injected tumors and induces IFN- $\beta$  and other**  
135 **inflammatory cytokine production in a cGAS/STING-dependent manner.** To elucidate mech-  
136 anisms of action of rMVA, we first investigated myeloid cell dynamics and determined which cell  
137 types are infected after IT viral therapy. To do that, we used the murine B16-F10 tumor implanta-  
138 tion model and injected the tumors with MVA $\Delta$ E5R expressing mCherry. At one or two-days post-  
139 injection, we harvested the tumors and analyzed tumor-infiltrating immune cells. IT MVA $\Delta$ E5R-  
140 mCherry injection led to an influx of neutrophils one day post-injection, which subsided after the  
141 second day, when monocytes started to increase in the tumor microenvironment (**Figure 2A**).  
142 Among the myeloid cell populations, macrophages were most heavily infected, as determined by  
143 mCherry expression in the infected cells, followed by monocytes, neutrophils, CD103<sup>+</sup>, and  
144 CD11b<sup>+</sup> DCs (**Figure 2B-2G**). T, B, or NK cells, however, were largely not infected by IT injected  
145 MVA $\Delta$ E5R (**Figure 2G**).

146

147 To investigate the innate immune responses of tumors induced by IT rMVA and the role of the  
148 cytosolic DNA-sensing pathway in this process, we isolated tumors from WT or STING<sup>Gt/Gt</sup> mice  
149 one day post treatment with rMVA or PBS (mock control) and subjected them to bulk RNA-seq  
150 analyses. We observed striking upregulation of genes involved in immune activation, apoptosis,  
151 and downregulation of genes involved in oxidative phosphorylation (**Figure 2H and 2I**). We sep-  
152 arated the immune activation genes into several subcategories, including cytokines and chemo-  
153 kines, interferon-stimulated genes (ISGs), activation markers, transcription factors, and other sen-  
154 sors. We found that rMVA treatment upregulated the expression of *Ifnb1*, *Ifng*, *Il-15*, *Il15ra*, *Ccl2*,  
155 *Ccl4*, *Ccl5*, *Cxcl9*, and *Cxcl10* in a STING-dependent manner (**Figure 2H and 2I**). We also ob-  
156 served up-regulation of DC activation markers, including *CD86* and *CD40*, and T cell activation  
157 markers, including *Gzma*, *Gzmb*, *Pfr1*, and *CD69*, as dependent on STING (**Figure 2H and 2I**).  
158 *Caspase 1*, *Caspase 3*, *Caspase 4*, *Caspase 8*, and *Fas* gene expression was also induced by IT

159 rMVA in WT mice but not in STING-deficient mice (**Figure 2H and 2I**). The expression of genes  
160 involved in oxidative phosphorylation was downregulated after IT rMVA injection in WT mice  
161 but not in STING-deficient mice (**Figure 2H and 2I**). Taken together, our results show that IT  
162 rMVA leads to infection and recruitment of myeloid cell populations and activation of innate im-  
163 mune responses in those cells via the cGAS/STING pathway.

164

165 **IT rMVA generates stronger systemic and local anti-tumor immune responses compared**  
166 **with MVA $\Delta$ E5R in a B16-F10 murine melanoma implantation model.** To determine the im-  
167 munological mechanism of rMVA-induced antitumor immune responses, we used a murine B16-  
168 F10 bilateral tumor implantation model. B16-F10 cells were intradermally implanted into both  
169 flanks of C57BL/6J mice. After tumors were established, we injected MVA $\Delta$ E5R, rMVA, or PBS  
170 as a control, to the right-side tumors twice, three days apart. Spleens and both tumors were har-  
171 vested 2 days after the second injection (**Figure 3A**). IT rMVA generated the highest numbers of  
172 tumor-specific IFN- $\gamma$ <sup>+</sup> T cells in the spleens compared with those treated with MVA $\Delta$ E5R or with  
173 PBS as determined by ELISpot assay (**Figure 3B and 3C**). In the injected tumors, IT rMVA re-  
174 sulted in stronger T cell activation with higher percentages and absolute numbers of granzyme B<sup>+</sup>  
175 CD8<sup>+</sup> and CD4<sup>+</sup> cells compared with MVA $\Delta$ E5R, or PBS control groups (**Figure 3D-3F**). In the  
176 non-injected tumors, IT rMVA also induced more granzyme B<sup>+</sup> CD8<sup>+</sup> and CD4<sup>+</sup> T cells (**Figure**  
177 **3G-3I**), demonstrating that IT rMVA enhances T cell activation both locally and systemically. IT  
178 rMVA also induced IFN- $\gamma$ <sup>+</sup> TNF- $\alpha$ <sup>+</sup> CD8<sup>+</sup> and CD4<sup>+</sup> T cells in the injected tumors, indicating en-  
179 hanced T cell effector function (**Figure 3J-3M**). Taken together, these results demonstrate that IT  
180 rMVA results in the activation of both CD8<sup>+</sup> and CD4<sup>+</sup> T cells in the injected and non-injected  
181 tumors, as well as in the generation of systemic antitumor immunity.

182

183 **rMVA-induced antitumor immune responses are dependent on the cGAS/STING-mediated**  
184 **cytosolic DNA-sensing and STAT2-mediated type I IFN signaling pathways.** We observed  
185 that the B16-F10-bearing cGAS, STING, or STAT2-deficient mice responded poorly to rMVA  
186 treatment (**Figure 1K and 1L**), which led us to hypothesize that the cGAS/STING-mediated cy-  
187 tosollic DNA-sensing and STAT2-dependent IFN signaling pathways are important for the gener-  
188 ation of antitumor CD8<sup>+</sup> T cell responses. To test that hypothesis, cGAS, STING, or STAT2-defi-  
189 cient and age-matched C57BL/6J control mice were intradermally implanted with B16-F10 cells



190 into their right flanks. IT rMVA generated polyfunctional IFN- $\gamma$ <sup>+</sup> TNF- $\alpha$ <sup>+</sup> CD8<sup>+</sup> and granzyme B<sup>+</sup>  
191 CD8<sup>+</sup> T cells in the injected tumors only in WT mice, whereas only IFN- $\gamma$ <sup>+</sup> CD8<sup>+</sup> T cells were  
192 induced by IT rMVA in cGAS<sup>-/-</sup> and STING<sup>Gt/Gt</sup> mice (**Figure 3N-3Q**). IT rMVA failed to induce  
193 either IFN- $\gamma$ <sup>+</sup>, Granzyme B<sup>+</sup> CD8<sup>+</sup> cells, or IFN- $\gamma$ <sup>+</sup> TNF- $\alpha$ <sup>+</sup> T cells in STAT2<sup>-/-</sup> mice (**Figure 3N-**  
194 **3Q**). These results indicate that both the cGAS/STING and STAT2-mediated signaling pathways  
195 are crucial for rMVA-induced T cell activation.

196

197 **IT rMVA depletes OX40<sup>hi</sup> Tregs in the injected tumors.** In addition to enhanced CD8<sup>+</sup> and  
198 CD4<sup>+</sup> T cell activation, we also observed that IT rMVA treatment resulted in a significant reduc-  
199 tion of Tregs in the injected tumors (**Figure 4A and 4B**). The mean percentages of Tregs  
200 (Foxp3<sup>+</sup>CD4<sup>+</sup>) out of CD4<sup>+</sup> T cells were 23%, 45%, and 51% in rMVA, MVA $\Delta$ E5R, or PBS-  
201 treated tumors, respectively (**Figure 4A and 4B**). The absolute numbers of Tregs in rMVA in-  
202 jected tumors were significantly reduced compared with the PBS-treated group (**Figure 4A and**  
203 **4B**). In the non-injected tumors, however, we did not observe a reduction of the percentages of  
204 Tregs out of CD4<sup>+</sup> T cells after rMVA treatment (**Figure 4C**). The percentages of cleaved caspase-  
205 3<sup>+</sup> cells out of tumor-infiltrating Tregs from rMVA-treated tumors were much higher compared  
206 with those from PBS-treated tumors (**Figure 4D and 4E**). These results support that rMVA treat-  
207 ment triggers apoptosis in tumor-infiltrating Tregs.

208

209 To determine whether Tregs play a negative role in recombinant MVA-based virotherapy, we im-  
210 planted B16-F10 cells intradermally into Foxp3-DTR mice. After the tumors were established, we  
211 treated the tumors with IT MVA $\Delta$ E5R, which does not significantly reduce Tregs (**Figure 4F**).  
212 Although intraperitoneal administration of diphtheria toxin (DT) alone did not affect tumor growth  
213 or survival (**Figure 4G and 4H**), DT plus IT MVA $\Delta$ E5R injection significantly improved thera-  
214 peutic efficacy compared with IT MVA $\Delta$ E5R alone (**Figure 4G and 4H**). These results suggest  
215 that Tregs play an inhibitory role in viral-based immunotherapy and intratumoral depletion of  
216 Tregs by rMVA is an important mechanism for potentiating antitumor immunity.

217

218 **IT rMVA preferentially depletes OX40<sup>hi</sup> Tregs via OX40L-OX40 interaction and IFNAR**  
219 **signaling.** We hypothesized that OX40L expressed by rMVA-infected myeloid and tumor cells  
220 might be important in mediating the reduction of OX40<sup>hi</sup> Tregs. We first compared the surface

221 expression of OX40 in various T cell populations within the tumor microenvironment. The mean  
222 percentages of OX40<sup>hi</sup> Tregs among CD4<sup>+</sup> Tregs were 51% compared with 5.6% of OX40<sup>hi</sup> con-  
223 ventional T (Tcov) cells and 1% of OX40<sup>hi</sup> CD8<sup>+</sup> T cells (**Figure 5A**). The mean fluorescence  
224 intensity (MFI) of OX40 was much higher in CD4<sup>+</sup> Tregs than those in Tcov and CD8<sup>+</sup> T cells  
225 (**Figure 5B and 5C**). The high expression of OX40 was unique to tumor-infiltrating Tregs, be-  
226 cause OX40 expression levels in Tregs from spleens or lymph nodes (LNs) were much lower than  
227 those from tumors (**Figure S3A**). Next, we compared the tumor-infiltrating OX40<sup>hi</sup> Treg popula-  
228 tion with or without IT rMVA treatment. IT rMVA treatment preferentially reduced the percent-  
229 ages of OX40<sup>hi</sup> Tregs out of total Tregs, as well as the absolute numbers of OX40<sup>hi</sup> Tregs per gram  
230 of tumors in the injected tumors (**Figure 5D and 5E**). In OX40-deficient mice, however, IT rMVA  
231 did not result in Treg reduction in the injected tumors (**Figure 5F**). Finally, we evaluated OX40L  
232 expression in both tumor cells and myeloid cells 2 days after IT rMVA. OX40L was detected on  
233 B16-F10, tumor-infiltrating macrophages, CD103<sup>+</sup> DCs, CD11b<sup>+</sup> DCs, neutrophils, and mono-  
234 cytes (**Figure S3B and S3C**). These results indicate that IT rMVA results in the OX40L expression  
235 in a variety of cell types including tumor and tumor-infiltrating myeloid cells and reduces tumor-  
236 infiltrating OX40<sup>hi</sup> Tregs likely via OX40-OX40L interaction.

237  
238 To evaluate whether the IFNAR signaling pathway is involved in rMVA-mediated Treg reduction,  
239 we co-administered anti-IFNAR-1 antibody with rMVA into implanted B16-F10 melanoma twice  
240 three days apart. Tumors were harvested two days post-second injection (**Figure 5G**). Whereas IT  
241 rMVA reduced the percentages of OX40<sup>hi</sup> Treg out of Tregs as well as the percentages of Tregs  
242 out of CD4<sup>+</sup> T cells, co-administration of anti-IFNAR-1 antibody with rMVA reversed the reduc-  
243 tion (**Figure 5H**). In addition, co-administration of anti-IFNAR-1 with rMVA resulted in lower  
244 percentages of Granzyme B<sup>+</sup> CD8<sup>+</sup> and CD4<sup>+</sup> T cells compared with IT rMVA alone (**Figure 5H**),  
245 which is consistent with the role of type I IFN in promoting CD8<sup>+</sup> and CD4<sup>+</sup> T cell activa-  
246 tion. Taken together, our results provide strong evidence that IT rMVA results in the depletion of  
247 OX40<sup>hi</sup> Tregs in the injected tumors via OX40L-OX40 interaction, and this process is facilitated  
248 by type I IFN induced by rMVA infection in the injected tumors.

249  
250 **Tumor-infiltrating OX40<sup>hi</sup> Tregs and OX40<sup>lo</sup> Tregs have distinctive transcriptomic fea-**  
251 **tures.** We observed that in the murine B16-F10 melanoma model, the percentage of OX40<sup>hi</sup> Tregs

252 in total Tregs positively correlated with tumor mass, suggesting that OX40<sup>hi</sup> Tregs may represent  
253 an immunosuppressive cell population during tumor progression (**Figure 6A**). To determine the  
254 functional differences between OX40<sup>hi</sup>, OX40<sup>lo</sup>, and OX40<sup>-/-</sup>Tregs, we intradermally implanted  
255 B16-F10 cells into Foxp3<sup>gfp</sup> and OX40<sup>-/-</sup>Foxp3<sup>gfp</sup> mice in a C57BL/6J background and FACS-  
256 sorted OX40<sup>hi</sup> and OX40<sup>lo</sup> intratumoral Tregs from Foxp3<sup>gfp</sup> mice and OX40<sup>-/-</sup> Tregs from OX40<sup>-/-</sup>  
257 Foxp3<sup>gfp</sup> mice and compared their suppression function *in vitro*. Flow cytometry analysis showed  
258 that OX40<sup>hi</sup> Tregs isolated from tumors suppressed Tconv proliferation more strongly compared  
259 with tumor-infiltrating OX40<sup>lo</sup> Tregs or OX40<sup>-/-</sup> Tregs *in vitro* (**Figure 6B and 6C**). We also iso-  
260 lated splenic Tregs from tumor-bearing Foxp3<sup>gfp</sup> mice and found that the suppressive activities of  
261 these cells were similar to those of OX40<sup>lo</sup> Tregs or OX40<sup>-/-</sup> Tregs isolated from tumors (**Figure**  
262 **6B and 6C**).

263  
264 To explore the transcriptomic differences between OX40<sup>hi</sup> and OX40<sup>low</sup> Tregs isolated from tu-  
265 mors and spleens, RNA-seq analysis was performed on sorted Treg populations from Foxp3-GFP  
266 mice as described above. Multidimensional scaling (MDS) plot showed that OX40<sup>hi</sup> and OX40<sup>lo</sup>  
267 Tregs from either spleens or tumors were segregated into distinct populations (**Figure 6D**).  
268 Whereas splenic OX40<sup>hi</sup> and OX40<sup>lo</sup> Tregs were similar to each other at the transcriptomic level,  
269 intratumoral OX40<sup>hi</sup> and OX40<sup>lo</sup> Tregs diverged from each other with 3309 upregulated genes and  
270 3846 down-regulated genes (**Figure 6E**). Pathway analysis showed that the main transcriptomic  
271 differences between splenic OX40<sup>hi</sup> and OX40<sup>lo</sup> Tregs were related to E2F targets and G2M check-  
272 points, suggesting that OX40<sup>hi</sup> Tregs are more proliferative compared with OX40<sup>lo</sup> Tregs in the  
273 spleens (**Figure 6F and 6G**). The upregulated genes in OX40<sup>hi</sup> Tregs compared with OX40<sup>lo</sup> Tregs  
274 from tumors belonged to the following pathways, including cell proliferation, DNA repair, oxida-  
275 tive phosphorylation, glycolysis, and the unfolded protein response (**Figure 6F and 6G**). Com-  
276 pared with OX40<sup>lo</sup> Tregs in the tumors, OX40<sup>hi</sup> Tregs had lower expression of genes that belong  
277 to type I and II IFN response and inflammation (**Figure 6F and 6G**). OX40<sup>hi</sup> Tregs had higher  
278 expression of *Casp3* and *Casp7*, suggesting that they might be more prone to apoptosis (**Figure**  
279 **6H**). In addition, OX40<sup>hi</sup> Tregs had higher *Il2ra* expression compared with OX40<sup>lo</sup> Tregs, which  
280 may explain their stronger suppressive capacity through competition for IL2 in the tumor micro-  
281 environment (**Figure 6H**). OX40<sup>hi</sup> Tregs also had high expression of *Ccl3* and *Ccl4* chemokines  
282 (**Figure 6H**), which have been implicated in chemoattraction of CCR5<sup>+</sup> CD4<sup>+</sup> and CD8<sup>+</sup> T cells

283 and immune suppression (Patterson et al., 2016). FACS analyses confirmed higher *CD39* and *Ccr8*  
284 expression in OX40<sup>hi</sup> tumor-infiltrating Tregs compared with OX40<sup>lo</sup> tumor-infiltrating Tregs  
285 (**Figure 6I**).

286  
287 Comparison of OX40<sup>hi</sup> Tregs in tumors vs. spleens revealed striking differences in these two pop-  
288 ulations. OX40<sup>hi</sup> Tregs in tumors have higher expression of chemokine receptors including *Ccr2*,  
289 *Ccr5*, *Ccr8*, *Cxcr3*, and *Cxcr6* as well as chemokines including *Ccl1*, *Ccl2*, *Ccl3*, *Ccl4*, *Ccl5*, *Ccl7*,  
290 *Ccl8*, *Ccl12*, *Ccl17*, *Ccl22*, *Cxcl2*, and *Cxcl9*, which suggest that they are migratory in response to  
291 chemokine cues in the developing tumors (**Figure S4A**). OX40<sup>hi</sup> Tregs in tumors also express  
292 higher levels of *Il10*, *Ctla4*, *Tnfrsf18* (*GITR*), thus correlating with a more potent immunosuppres-  
293 sive function (**Figure S4B**). Furthermore, OX40<sup>hi</sup> Tregs in tumors express higher levels of genes  
294 involved in glycolysis and oxidative phosphorylation (**Figure S4C and S4D**).

295  
296 **CD8<sup>+</sup> T cells are required for the antitumor effects induced by IT rMVA.** To determine which  
297 cell populations are essential for tumor eradication by IT rMVA, we performed an antibody deple-  
298 tion experiment using anti-CD8 and/or anti-CD4 antibodies during rMVA treatment. The depleting  
299 antibodies were first given intraperitoneally two days before IT rMVA and then were given at the  
300 same time when mice were treated with IT rMVA (**Figure 7A**). Depletion of CD8<sup>+</sup> cells abrogated  
301 the therapeutic effect of rMVA (**Figure 7B and 7C**). Although CD4<sup>+</sup> T cell depletion resulted in  
302 a better response to rMVA treatment initially, however, the antitumor response did not persist in  
303 the CD4<sup>+</sup> T cell-depleted mice after IT rMVA treatment ended on day 42. 60% of mice died due  
304 to the recurrence of tumors. Mice with both CD4<sup>+</sup> and CD8<sup>+</sup> T cell-depleted behaved similarly to  
305 those with just CD8<sup>+</sup> T cell depletion (**Figure 7B and 7C**). These results suggested that CD8<sup>+</sup> T  
306 cells are required for tumor eradication in IT rMVA therapy, while CD4<sup>+</sup> T cells may be important  
307 for facilitating the generation of anti-tumor memory responses.

308  
309 **IT rMVA activates pre-existing CD8<sup>+</sup> T cells in the tumors, which is sufficient for the eradi-**  
310 **cation of injected tumors.** To determine whether local T cell activation or T cell recruitment from  
311 tumor-draining lymph nodes (TDLNs) is important for rMVA-induced antitumor effects in the  
312 injected tumors, we administered FTY720 (fingolimod), a modulator of the sphingosine-1-phos-  
313 phosphate receptor, which blocks T cell egress from lymphoid organs. FTY720 was given

314 intraperitoneally one day before IT rMVA and was later given to the mice twice a week on the  
315 days when they were treated with IT rMVA (**Figure 7D**). FACS analysis confirmed that FTY720  
316 treatment depletes CD8<sup>+</sup> and CD4<sup>+</sup> T cells in the blood (**Figure 7E and 7F**). We observed that  
317 FTY720 treatment alone did not affect tumor growth. Co-administration of FTY720 with IT rMVA  
318 treatment did not diminish the antitumor effect of IT rMVA (**Figure 7G and 7H**). When the su-  
319 riving mice previously treated with IT rMVA alone or with IT rMVA plus FTY720 were chal-  
320 lenged with a lethal dose of B16-F10 on the contralateral side at 7 weeks post tumor eradication,  
321 80% of the mice in the rMVA plus FTY720 group and 100% of the mice in the rMVA alone group  
322 were able to reject tumor challenge (**Figure 7I**). No FTY720 was administered during the chal-  
323 lenge phase. We analyzed T cells from both the injected tumors and TDLNs with or without  
324 FTY720 treatment, and found that Granzyme B<sup>+</sup>CD8<sup>+</sup> T cells were increased after rMVA treat-  
325 ment with or without FTY720, indicating that IT rMVA directly activates preexisting antitumor  
326 CD8<sup>+</sup> T cells in the tumors without lymph node involvement (**Figure 7J and 7K**). In the FTY720-  
327 treated group, the percentages of Granzyme B<sup>+</sup>CD8<sup>+</sup> T cells in the TDLNs were higher than that  
328 of the DMSO control group with rMVA injection (**Figure 7L**), indicating that the newly primed  
329 CD8<sup>+</sup> T cells were trapped in the TDLNs. These results indicate that IT rMVA-induced local ac-  
330 tivation of anti-tumor T cells is sufficient for the eradication of injected tumors.

331  
332 **Combination of IT delivery of rMVA with systemic administration of anti-PD-L1 antibody**  
333 **provides systemic antitumor therapeutic effects.** B16-F10 tumors respond poorly to immune  
334 checkpoint blockade (ICB) therapy. To test whether the combination of systemic delivery of ICB  
335 antibody and IT rMVA therapy can overcome the resistance to ICB therapy, we used a bilateral  
336 B16-F10 implantation model and compared the antitumor efficacy of with IT rMVA alone vs. IT  
337 rMVA plus intraperitoneal (IP) delivery of anti-PD-L1 antibody (**Figure 8A**). IT rMVA alone  
338 eradicated 9 out of 10 injected tumors and delayed the growth of non-injected tumors. However,  
339 90% of mice died eventually due to the growth of non-injected tumors (**Figure 8B and 8C**). By  
340 contrast, the combination of IP anti-PD-L1 antibody and IT rMVA significantly improved the an-  
341 titumor therapeutic efficacy (**Figure 8B and 8C**). 80% of mice in the combination group rejected  
342 non-injected tumors and survived. These results demonstrated that the combination of systemic  
343 delivery of anti-PD-L1 antibody and IT rMVA generates synergistic systemic antitumor therapeu-  
344 tic effects, leading to the eradication of both injected and non-injected tumors.

345

346 **IT rMVA is effective in generating antitumor T cell responses and controlling tumor growth**  
347 **in murine A20 B cell lymphoma and triple-negative breast cancer models.** In addition to mu-  
348 rine B16-F10 melanoma, we evaluated the therapeutic efficacy of IT rMVA in other murine tumor  
349 models. IT rMVA efficiently eradicated A20 B cell lymphoma tumors and resulted in 100% sur-  
350 vival (**Figure 8D and 8E**). MMTV-PyMT is a transgenic mouse strain that develops multiple  
351 tumors in the mammary fat pads spontaneously, commonly used as a triple-negative breast tumor  
352 model. In the MMTV-PyMT mice, IT injection of rMVA resulted in delayed tumor growth com-  
353 pared with the PBS control group (**Figure 8F**). Similar to what we observed in the B16-F10 murine  
354 melanoma model, IT rMVA activated CD8<sup>+</sup> T cells in the tumors and reduced Tregs (**Figure 8G-**  
355 **8I**).

356

357 **Clinical candidate rhMVA (MVA $\Delta$ E5R-hFlt3L-hOX40L) induces innate immunity and pro-**  
358 **motates maturation of human monocyte-derived DCs (moDCs).** For clinical applications, we  
359 generated an rhMVA expressing human Flt3L and human OX40L and with the deletion of E5R  
360 gene (**Figure S5A**). hFlt3l and hOX40L are membrane-bound ligands that were expressed on the  
361 surface of murine B16-F10 cells and human melanoma cell line, SK-MEL-28, after infection with  
362 rhMVA *in vitro* (**Figure S5B**). rhMVA induced higher levels of *ifnb* gene expression as well as  
363 *ccl4*, *ccl5*, *cxcl10*, *il1b*, *il6*, and *tnf* in moDCs compared with MVA (**Figure S5C**). rhMVA infec-  
364 tion of moDCs induced the expression of CD86 on the cell surface, which is indicative of DC  
365 maturation (**Figure S5D**).

366

367 To test whether *ex vivo* infection of human tumor samples with rhMVA could induce phenotypic  
368 changes of tumor-infiltrating lymphocytes (TILs), we obtained skin biopsy samples from patients  
369 with extramammary paget's disease (EMPD), infected the processed tissues with rhMVA, and  
370 analyzed TILs 24 h later (**Figure 8K**). We found that rhMVA-infected samples exhibited upregu-  
371 lation of granzyme B on CD8<sup>+</sup> T cells as well as reduction of Tregs compared with the paired  
372 control samples (**Figure 8L**). These results are consistent with what we observed in various murine  
373 tumors treated with rMVA *in vivo*, further supporting rhMVA as a potential clinical candidate for  
374 the treatment of various human cancers.

## 375 **Discussion**

376

377 Preclinical and clinical studies have shown that viral-based immunotherapeutics can alter immu-  
378 nosuppressive tumor microenvironment to enhance antitumor effects and overcome resistance to  
379 immune checkpoint blockade antibody therapy. Our previous study using heat-inactivated modi-  
380 fied vaccinia virus Ankara (heat-iMVA) demonstrated that induction of innate immunity via the  
381 STING-dependent pathway in the tumor microenvironment is important for the generation of sys-  
382 temic antitumor immunity (Dai et al., 2017), which is also dependent on CD8<sup>+</sup> T cells and Batf3-  
383 dependent CD103<sup>+</sup>/CD8 $\alpha$ <sup>+</sup> DCs. Based on this concept, we engineered a recombinant MVA  
384 (rMVA) with deletion of the vaccinia E5R gene, which encodes an inhibitor of cGAS, and with  
385 the expression of two membrane-bound transgenes, human Flt3L, and murine OX40L. Here we  
386 show that rMVA activates innate immunity via the cGAS/STING pathway and the IFNAR positive  
387 feedback loop, and also reduces OX40<sup>hi</sup> regulatory T cells via OX40L-OX40 interaction in the  
388 injected tumors.

389 Poxviruses are large cytoplasmic DNA viruses. DNAs from the parental viral genome and the  
390 replicated progeny viral genome are potent stimuli for activating the cytosolic DNA-sensing path-  
391 way mediated by cGAS/STING. The vaccinia E5R gene is highly conserved among the orthopox-  
392 virus family which includes variola virus, the causative agent of smallpox, and vaccinia virus, the  
393 laboratory strain that leads to the eradication of smallpox. MVA $\Delta$ E5R infection of BMDCs in-  
394 duces higher levels of type I IFN compared with MVA, which is dependent on cGAS. Similarly,  
395 rMVA infection of BMDCs induces much higher levels of IFN compared with MVA. rMVA in-  
396 fection also induces cGAS-dependent DC maturation. IT delivery of rMVA generates stronger  
397 local and systemic antitumor effects compared with MVA, or MVA $\Delta$ E5R. Using cGAS, STING,  
398 STAT1, and STAT2-deficient mice, we demonstrated that the cGAS/STING-mediated cytosolic  
399 DNA-sensing and STAT1/STAT2-mediated type I IFN pathways are required for the generation  
400 of antitumor immunity by rMVA. In addition to the induction of innate immunity, IT delivery of  
401 rMVA reduces OX40<sup>hi</sup> Foxp3<sup>+</sup>CD4<sup>+</sup> regulatory T cells in the injected tumors via OX40L/OX40  
402 interaction which is reversed in the presence of anti-IFNAR antibody. Furthermore, using FTY720  
403 to block lymphocyte egress from lymphoid organs, we demonstrated that IT rMVA-induced local  
404 activation of tumor-specific T cells in the injected tumors is sufficient for its eradication.

405 To understand why the cGAS/STING pathway is important in rMVA-induced antitumor immunity,  
406 we first evaluated what cell populations in the tumor microenvironment are preferentially infected  
407 by the virus. Using MVA $\Delta$ E5R-expressing the mCherry reporter under the vaccinia virus synthetic  
408 early/late promoter, we found that the myeloid cell populations including macrophages, monocytes,  
409 neutrophils, and dendritic cells are targeted by the virus, whereas lymphocytes are largely spared.  
410 RNA-seq analyses of tumor tissues isolated 24 h post IT rMVA revealed marked upregulation in  
411 the expression of *Ifnb*, inflammatory cytokines and chemokines, DC activation markers, IFN-stim-  
412 ulated genes, and genes involved in apoptosis in WT mice, but not in STING-deficient mice. On  
413 the contrary, the expression of genes involved in oxidative phosphorylation was reduced in rMVA-  
414 treated tumors in WT mice, but not in STING-deficient mice.

415  
416 We next addressed how innate immune activation, for example, the cGAS/STING pathway and  
417 type I IFN signaling in the tumor microenvironment, affects the activation status of tumor-infil-  
418 trating T cells. Using cGAS, STING, or STAT2-deficient mice or intratumoral delivery of anti-  
419 IFNAR antibody, we found that the activation of intratumoral CD8<sup>+</sup> and CD4<sup>+</sup> T cells depends on  
420 the generation of type I IFN and IFN signaling in the tumor microenvironment. This is consistent  
421 with a published report that type I IFN signaling drives antigen-independent expression of  
422 granzyme B on memory CD8<sup>+</sup> T cells in a respiratory viral infection model (Kohlmeier et al.,  
423 2010). While IT rMVA was ineffective in shrinking tumors when CD8<sup>+</sup> T cells were depleted,  
424 CD4<sup>+</sup> T cells depletion did not impede tumor control initially. However, tumors regrew when both  
425 the anti-CD4 antibody and rMVA treatment were discontinued. We interpret these results as the  
426 following: As anti-CD4 antibody removes both Tcov and Tregs from tumors and circulation, mice  
427 were able to control tumor growth with activated CD8<sup>+</sup> T cells which function better in the absence  
428 of Tregs. However, they fail to develop antitumor memory CD8<sup>+</sup> T cells in the absence of helper  
429 CD4<sup>+</sup> T cells.

430  
431 Our study demonstrates that IT rMVA preferentially reduces OX40<sup>hi</sup> Tregs in injected tumors via  
432 the OX40L-OX40 interaction and this process is promoted by type I IFN in the tumor microenvi-  
433 ronment. We found that OX40 is preferentially expressed by intratumoral Tregs and its expression  
434 correlates with tumor weight in murine melanoma models. OX40<sup>hi</sup> Tregs isolated from tumors are  
435 more immunosuppressive compared with OX40<sup>low</sup> Tregs. Comparison of the transcriptomes of



436 OX40<sup>hi</sup> and OX40<sup>lo</sup> intratumoral Tregs revealed that OX40<sup>hi</sup> Tregs are more proliferative, meta-  
437 bologically active, and immunosuppressive. Therefore, targeting intratumoral OX40<sup>hi</sup> Tregs by  
438 rMVA expressing OX40L is a logical approach to deplete this cell population within the tumors  
439 but not in the periphery, and thereby improving the efficacy of immunotherapy without unwanted  
440 autoimmunity. We found that OX40<sup>hi</sup> Tregs expressed higher levels of CCR8 compared with  
441 OX40<sup>lo</sup> Tregs. CCR8<sup>+</sup> Tregs have been reported to play important roles in immune suppression in  
442 mice and humans (Barsheshet et al., 2017; Coghill et al., 2013; Plitas et al., 2016). Targeting  
443 CCR8<sup>+</sup> Tregs using an anti-CCR8 antibody showed therapeutic benefits for cancer treatment and  
444 cancer vaccines in preclinical models (Villarreal et al., 2018). In addition to CCR8<sup>+</sup>, OX40<sup>hi</sup> Tregs  
445 also expressed higher levels of *Il2ra*, *Ctla4*, *Tnfrsf18*, *Il10*, and *Cd39*, which are consistent with  
446 their immunosuppressive functions (Chinen et al., 2016; Cohen et al., 2010; Leone et al., 2018;  
447 Maj et al., 2017; Wing et al., 2008; Zappasodi et al., 2019).

448

449 Our results also showed that intratumoral OX40<sup>hi</sup> Tregs had marked upregulation of genes in-  
450 volved in oxidative phosphorylation compared with intratumoral OX40<sup>lo</sup> Tregs or with OX40<sup>hi</sup>  
451 Tregs in the spleens. Several recent studies highlight the potential of modulating Treg stability and  
452 functions through metabolic control (Field et al., 2020; He et al., 2017; Weinberg et al., 2019;  
453 Zappasodi et al., 2021). How IT rMVA alters metabolism of OX40<sup>hi</sup> Tregs via OX40L-OX40  
454 interaction and the role of IFNAR signaling on Tregs on metabolic alterations and apoptosis will  
455 be addressed in future studies.

456

457 FTY720 (fingolimod), a sphingosine 1-phosphate receptor (S1P-R) agonist, is a novel immuno-  
458 modulatory agent that blocks lymphocyte egress from lymphoid organs, FDA-approved for the  
459 treatment of relapsing multiple sclerosis. We observed that FTY720 did not affect the antitumor  
460 effects of rMVA in the injected tumors, despite trapping CD8<sup>+</sup> T cells in the TDLNs, supporting  
461 our hypothesis that local activation of CD8<sup>+</sup> T cells in the injected tumors is sufficient to eliminate  
462 the injected tumors. We provided evidence that type I IFN induction by rMVA in the injected  
463 tumors facilitates the proliferation and activation of CD8<sup>+</sup> T cells. In addition, IFN contributes to  
464 the depletion of OX40<sup>hi</sup> Tregs via the OX40L-OX40 ligation on Tregs. Removal of immunosup-  
465 pressive OX40<sup>hi</sup> Tregs in the rMVA-infected tumors leads to the activation of CD8<sup>+</sup> and CD4<sup>+</sup> T  
466 cells.

467

468 Taken together, we propose the following working model for elucidating the mechanisms of action  
469 of rMVA (**Figure S6**). After intratumoral injection with rMVA, both tumors and tumor-infiltrating  
470 myeloid cells are infected by the virus, which leads to the expression of hFlt3L and mOX40L  
471 transgenes on the cell surface, as well as the induction of type I IFN and proinflammatory cytokines  
472 and chemokines via the cGAS/STING-dependent cytosolic DNA-sensing pathway from the resi-  
473 dent and recruited tumor-infiltrating myeloid cells. Type I IFN plays an important role in activating  
474 DCs and tumor-infiltrating CD8<sup>+</sup> and CD4<sup>+</sup> T cells. In addition, OX40L expression on infected  
475 tumor and myeloid cells leads to the depletion of OX40<sup>hi</sup> Tregs via OX40L-OX40 interaction,  
476 which further enhances the antitumor activities of CD8<sup>+</sup> and CD4<sup>+</sup> T cells. Therefore, rMVA  
477 engages both innate and adaptive immunity to generate local and systemic antitumor effects, which  
478 are amplified in the presence of immune checkpoint blockade antibodies.

479

480 OX40 modulating agents have been explored for enhancing antitumor effects through targeting  
481 Tregs. For example, the combination of anti-OX40 agonist antibody with cyclophosphamide trig-  
482 gers activation and apoptosis of intratumoral Tregs while causing Treg expansion in the TDLN  
483 and spleens (Hirschhorn-Cymerman et al., 2009). This combination also promotes tumor-killing  
484 activities of antigen-specific adoptively transferred CD4<sup>+</sup> T cells (Hirschhorn-Cymerman et al.,  
485 2012). In addition, intratumoral delivery of low doses of anti-CTLA-4 and anti-OX40 antibodies  
486 together with TLR9 agonist CpG leads to Treg depletion at the injected site but not in the non-  
487 injected site and generates systemic antitumor immunity (Marabelle et al., 2013). Our RNA-seq  
488 results confirmed that OX40<sup>hi</sup> intratumoral Tregs express higher levels of CTLA-4 as well as other  
489 immune suppressive markers compared with OX40<sup>lo</sup> Tregs. Therefore, our approach of using a  
490 recombinant immune-activating virus to express OX40L represents a novel strategy to deplete  
491 OX40<sup>hi</sup> immunosuppressive Tregs. Compared with anti-OX40 agonist antibody approach, our en-  
492 gineered virus expressing OX40L might be more specific in targeting OX40<sup>hi</sup> Tregs within the  
493 tumor microenvironment. IFN-inducing ability of the virus also promotes Treg depletion. The  
494 combination of intratumoral delivery of rMVA expressing mOX40L with systemic delivery of  
495 anti-PD-L1 antibody generates synergistic antitumor effects. This is in contrast to two reports  
496 showing that concurrent administration of anti-PD1 antibody leads to reduced efficacy of anti-

497 OX40 antibody due to apoptosis of activated T cells (Messenheimer et al., 2017; Shrimali et al.,  
498 2017).

**Figure 1**

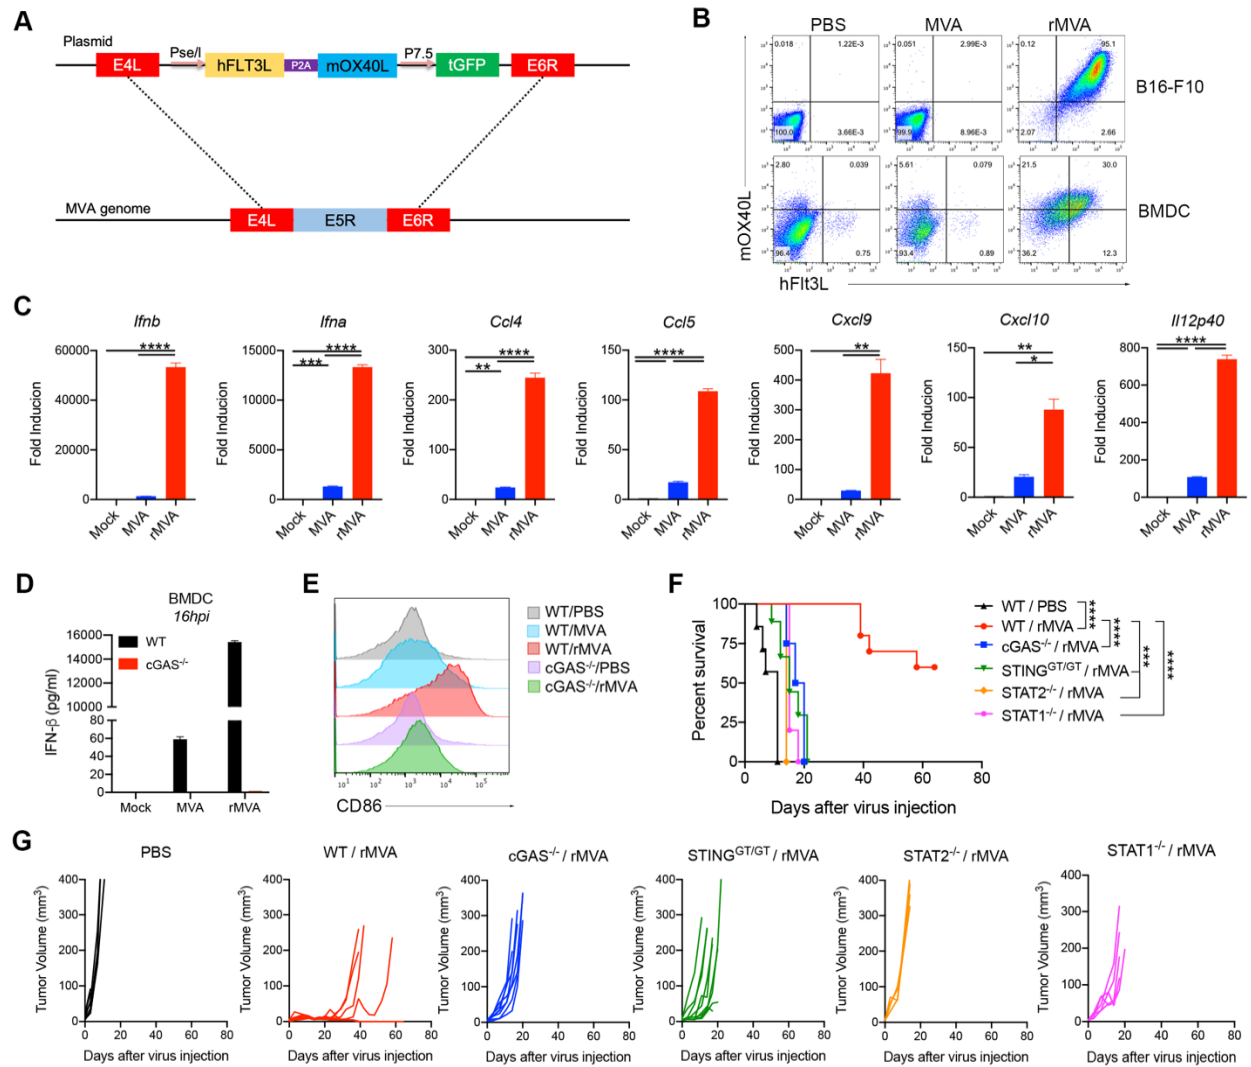

499 **Figure 1. Intratumoral injection (IT) of rMVA elicits strong antitumor immune responses**  
500 **that is dependent on cGAS-STING and STAT1/STAT2.**

501 (A) Schematic diagram for the generation of rMVA through homologous recombination.

502 (B) Representative flow cytometry plots of expression of hFlt3L or mOX40L by rMVA-infected  
503 B16-F10 cells and BMDCs.

504 (C) Relative mRNA expression levels of *Ifnb*, *Ifna*, *Ccl4*, *Ccl5*, *Cxcl9*, *Cxcl10* and *Il12p40* in  
505 BMDCs infected with MVA or rMVA. Data are means  $\pm$  SD ( $n=3$ ;  $*P < 0.05$ ,  $**P < 0.01$ ,  $***P$   
506  $< 0.001$ ,  $****P < 0.0001$ , *t test*).

507 (D) Concentrations of secreted IFN- $\beta$  in the medium of WT or cGAS<sup>-/-</sup> BMDCs infected with  
508 MVA or rMVA. Data are means  $\pm$  SD.

509 (E) Mean fluorescence intensity of CD86 expressed by WT or cGAS<sup>-/-</sup> BMDCs infected with  
510 MVA or rMVA.

511 (F) Kaplan-Meier survival curve of mice treated with rMVA or PBS in a unilateral B16-F10 im-  
512 plantation model ( $n=5\sim 10$ ;  $***P < 0.001$ ,  $****P < 0.0001$ , *Mantel-Cox test*).

513 (G) Tumor growth curve of mice treated with rMVA or PBS in a unilateral B16-F10 implanta-  
514 tion model.

**Figure 2**

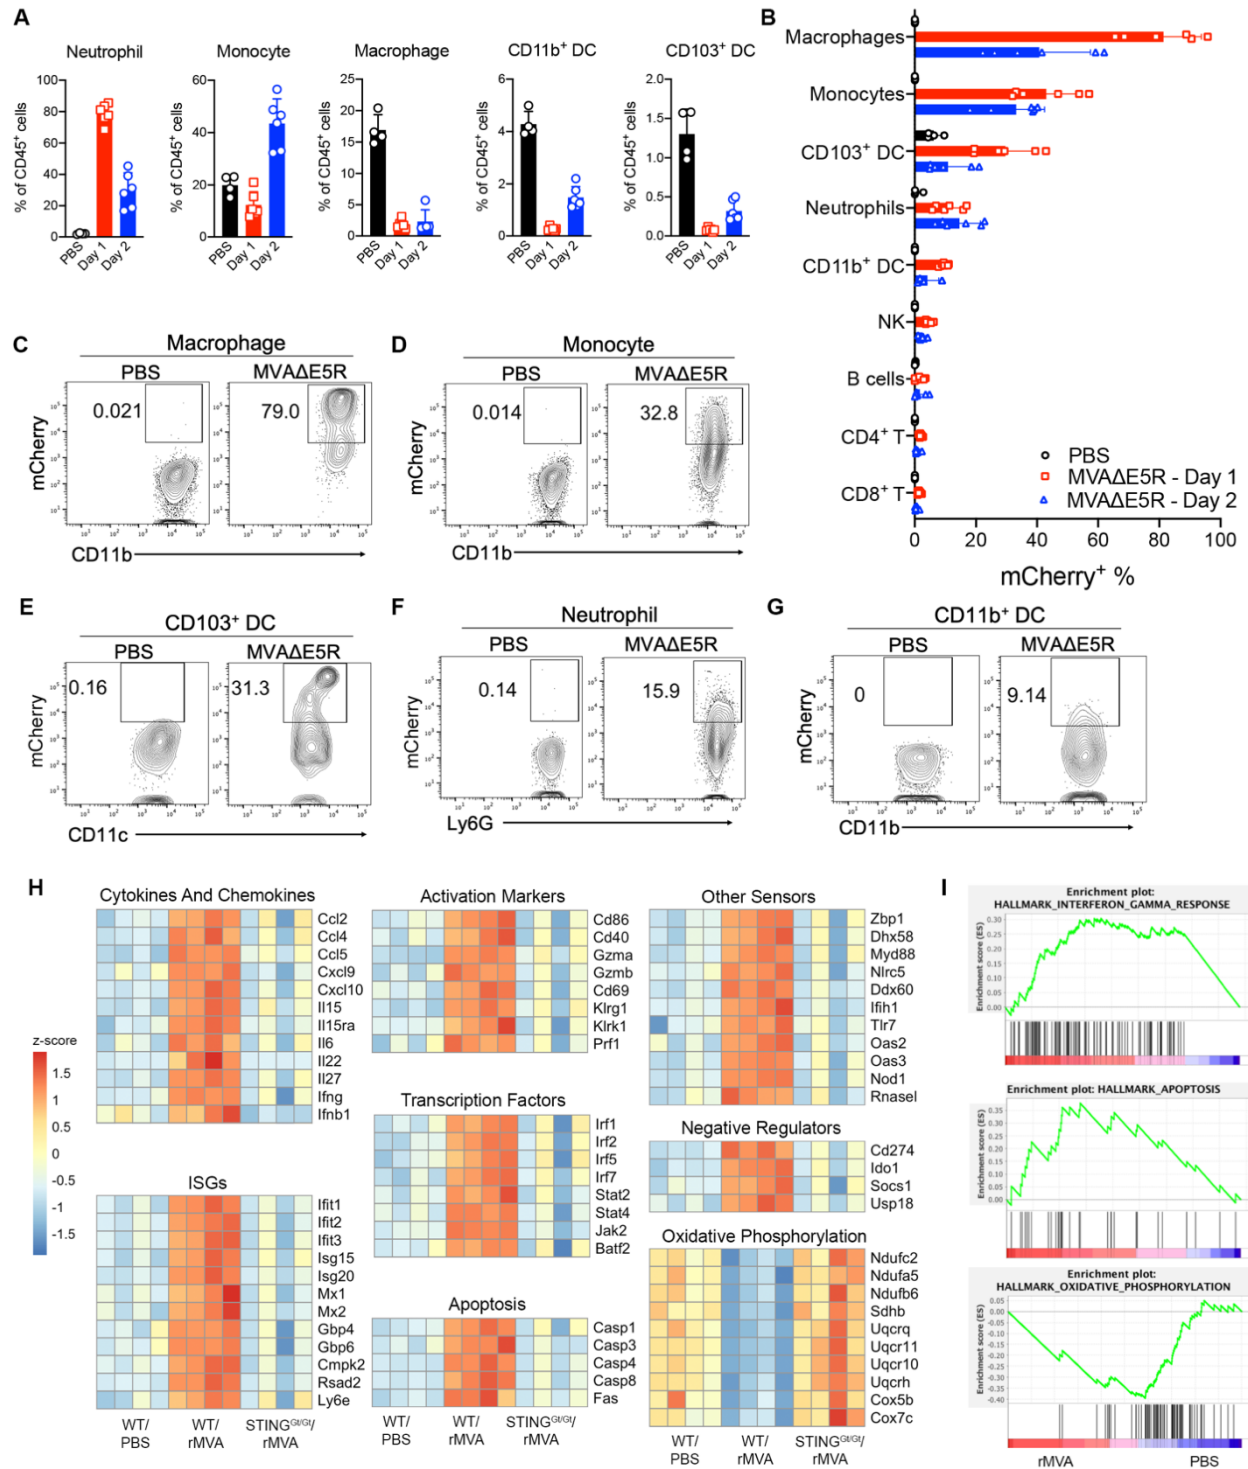

515 **Figure 2. Influx of myeloid cells into MVAE5R-treated tumors and induction of IFN- $\beta$  and**  
516 **other inflammatory cytokine production in a cGAS/STING-dependent manner.**  
517 (A) Percentages of neutrophils, monocytes, macrophages, CD103<sup>+</sup> DCs and CD11b<sup>+</sup> DCs in the  
518 MVA $\Delta$ E5R-treated tumors. Mice were intradermally implanted with B16-F10 cells. 7 days post  
519 implantation, tumors were injected with MVA $\Delta$ E5R-mCherry or PBS as control and harvested 1-  
520 or 2-days post injection for myeloid cell analysis. Data are means  $\pm$  SD ( $n=4\sim6$ ).  
521 (B) Percentages of mCherry<sup>+</sup> immune cells. Data are means  $\pm$  SD ( $n=4\sim6$ ).  
522 (C-G) Representative flow cytometry plots of mCherry<sup>+</sup> immune cells.  
523 (H) Heatmap of gene expression from bulk tumor RNA-seq analysis.  
524 (I) Gene set enrichment analysis.

**Figure 3**

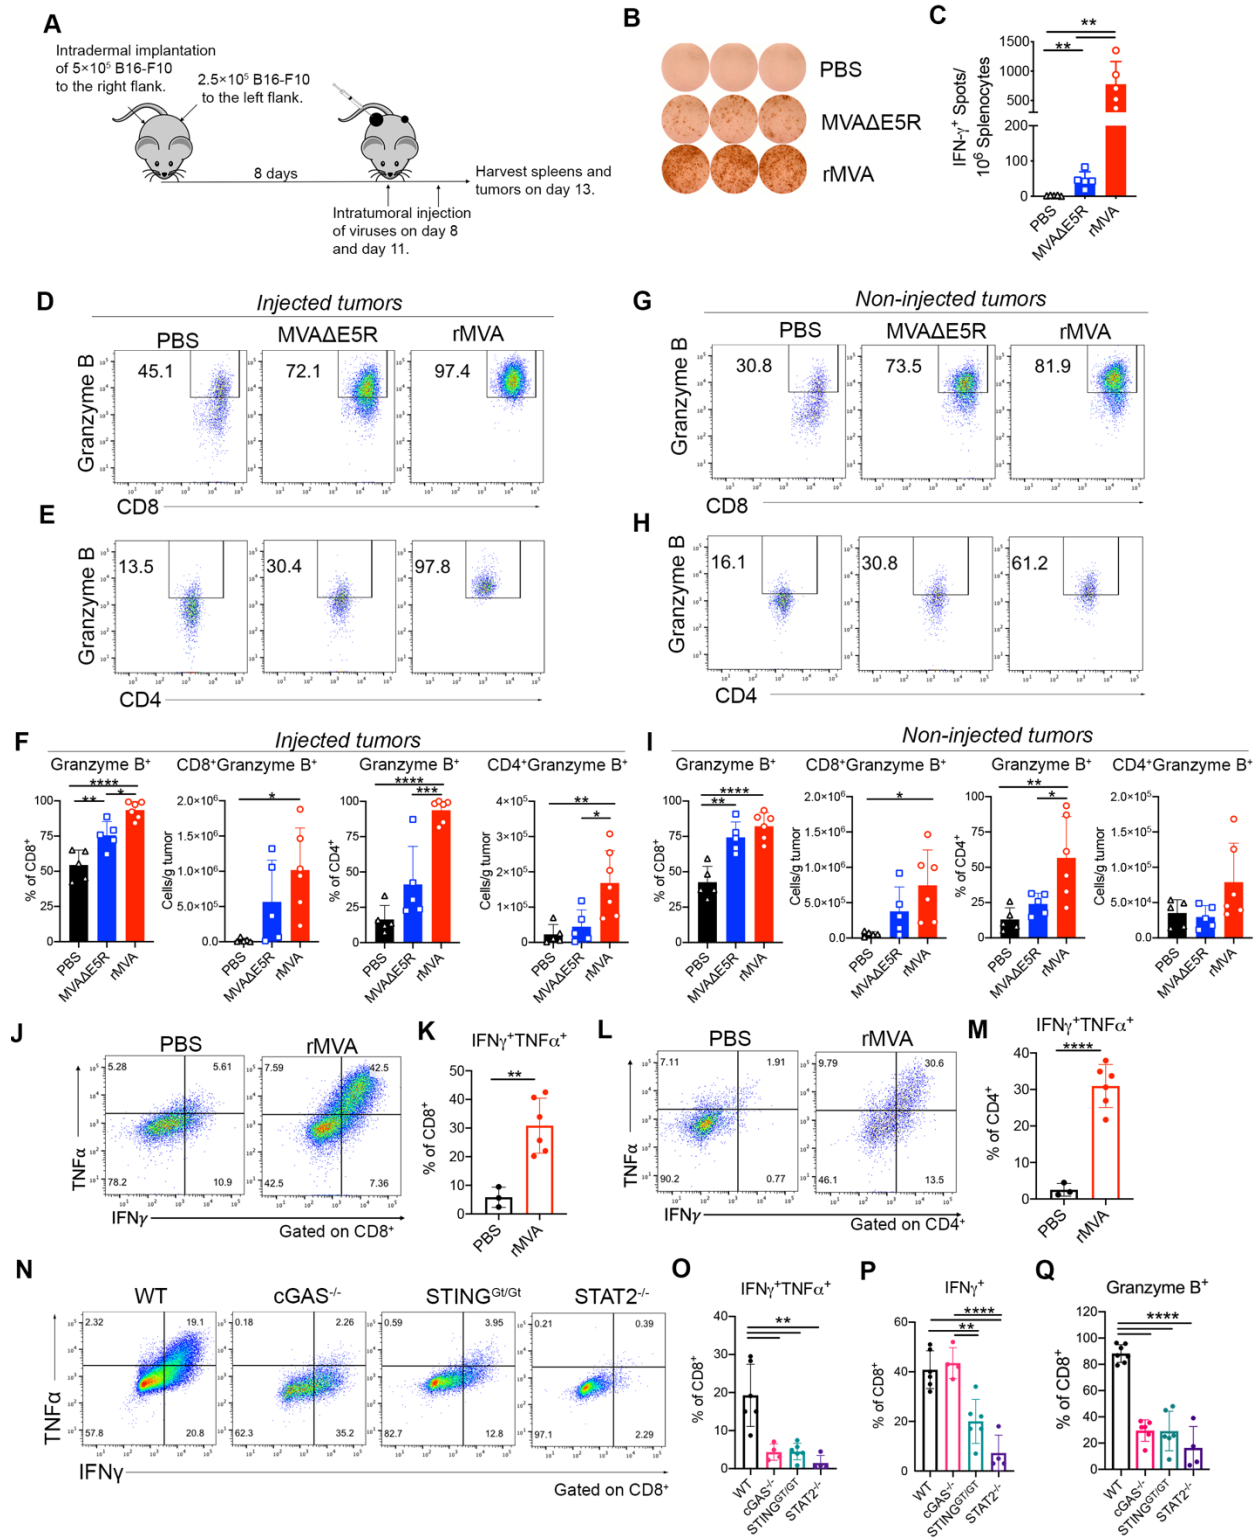



525 **Figure 3. IT rMVA generates strong systemic and local anti-tumor immune responses**  
526 **which is dependent on cGAS/STING/STAT2 pathways.**

527 (A) Schematic diagram of IT rMVA or MVAΔE5R for ELISpot assay and TIL analysis in a mu-  
528 rine B16-F10 melanoma implantation model.

529 (B) Representative images of IFN- $\gamma$ <sup>+</sup> spots from ELISpot assay.

530 (C) Statistical analysis of IFN- $\gamma$ <sup>+</sup> splenocytes from MVAΔE5R, rMVA or PBS-treated mice.  
531 Data are means  $\pm$  SD ( $n=5$  or  $6$ ;  $**P < 0.01$ ,  $t$  test).

532 (D-E) Representative flow cytometry plots of Granzyme B<sup>+</sup> CD8<sup>+</sup> (D) and Granzyme B<sup>+</sup> CD4<sup>+</sup>  
533 cells (E) in the injected tumors.

534 (F) Percentages and absolute number of Granzyme B<sup>+</sup> CD8<sup>+</sup> and Granzyme B<sup>+</sup> CD4<sup>+</sup> cells in the  
535 injected tumors. Data are means  $\pm$  SD ( $n=5$  or  $6$ ;  $*P < 0.05$ ,  $**P < 0.01$ ,  $***P < 0.001$ ,  $****P <$   
536  $0.0001$ ,  $t$  test).

537 (G-H) Representative flow cytometry plots of Granzyme B<sup>+</sup> CD8<sup>+</sup> (G) and Granzyme B<sup>+</sup> CD4<sup>+</sup>  
538 cells (H) in the non-injected tumors.

539 (I) Percentages and absolute number of Granzyme B<sup>+</sup> CD8<sup>+</sup> (J) and Granzyme B<sup>+</sup> CD4<sup>+</sup> (K) cells  
540 in the non-injected tumors. Data are means  $\pm$  SD ( $n=5$  or  $6$ ;  $*P < 0.05$ ,  $**P < 0.01$ ,  $****P <$   
541  $0.0001$ ,  $t$  test).

542 (J-M) Representative flow cytometry plots and statistical analysis of IFN $\gamma$ <sup>+</sup>TNF $\alpha$ <sup>+</sup> CD8<sup>+</sup> (J, K)  
543 and IFN $\gamma$ <sup>+</sup>TNF $\alpha$ <sup>+</sup> CD4<sup>+</sup> cells (L, M) in the injected tumors. Data are means  $\pm$  SD ( $n=3$  or  $6$ ;  $**P$   
544  $< 0.01$ ,  $****P < 0.0001$ ,  $t$  test).

545 (N) Representative flow cytometry plots of IFN $\gamma$ <sup>+</sup>TNF $\alpha$ <sup>+</sup> CD8<sup>+</sup> T cells in the injected tumors har-  
546 vested from WT, cGAS<sup>-/-</sup>, STING<sup>Gt/Gt</sup>, and STAT2<sup>-/-</sup> mice.

547 (O) Percentages of IFN $\gamma$ <sup>+</sup>TNF $\alpha$ <sup>+</sup> CD8<sup>+</sup> T cells in the injected tumors from WT, cGAS<sup>-/-</sup>,  
548 STING<sup>Gt/Gt</sup> and STAT2<sup>-/-</sup> mice. Data are means  $\pm$  SD ( $n=4\sim6$ ;  $**P < 0.01$ ,  $t$  test).

549 (P) Percentages of IFN $\gamma$ <sup>+</sup> CD8<sup>+</sup> T cells in the injected tumors from WT, cGAS<sup>-/-</sup>, STING<sup>Gt/Gt</sup> and  
550 STAT2<sup>-/-</sup> mice. Data are means  $\pm$  SD ( $n=4\sim6$ ;  $**P < 0.01$ ,  $t$  test).

551 (Q) Percentages of Granzyme B<sup>+</sup> CD8<sup>+</sup> T cells in the injected tumors from WT, cGAS<sup>-/-</sup>,  
552 STING<sup>Gt/Gt</sup> and STAT2<sup>-/-</sup> mice. Data are means  $\pm$  SD ( $n=4\sim6$ ;  $****P < 0.0001$ ,  $t$  test).

**Figure 4**

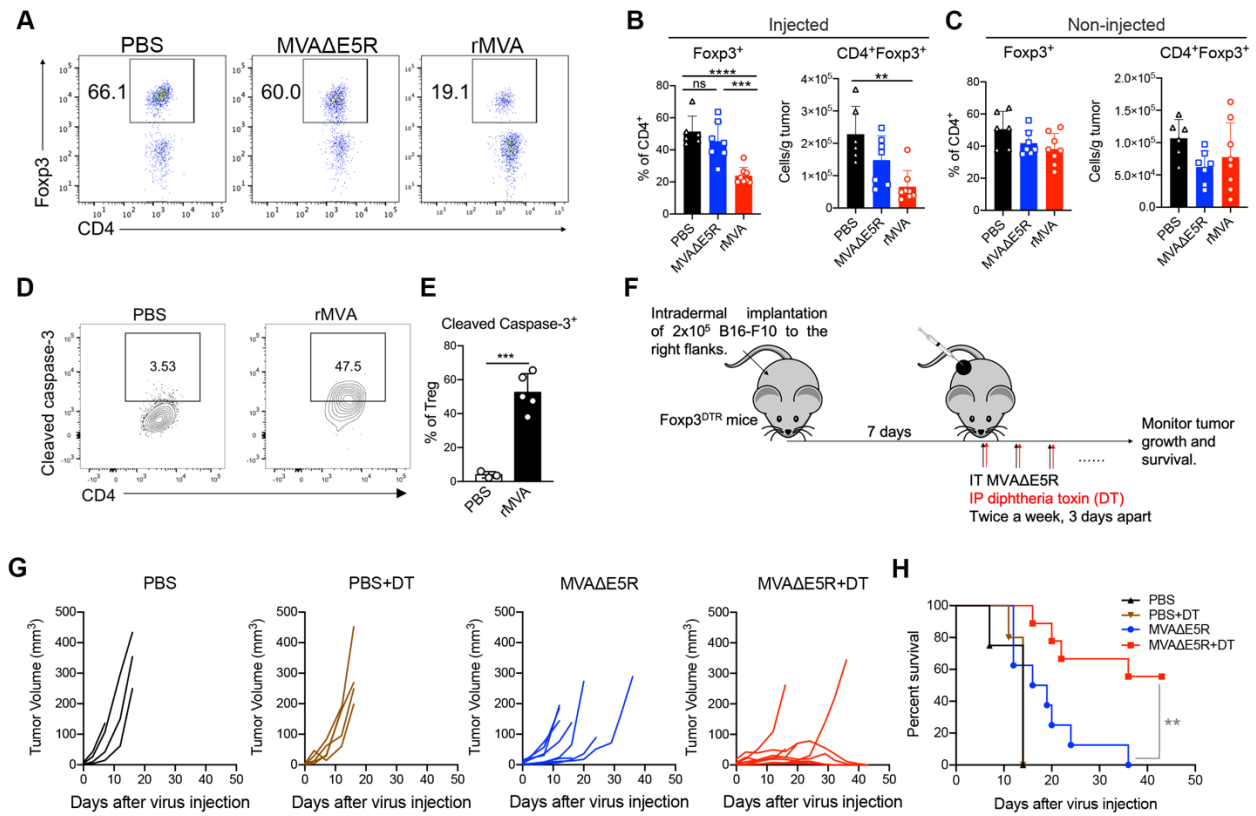

553 **Figure 4. IT rMVA depletes OX40<sup>hi</sup> Tregs in the injected tumors to promote anti-tumor**  
554 **therapy.**

555 (A) Representative flow cytometry plots of Foxp3<sup>+</sup>CD4<sup>+</sup> cells in the injected tumors. Mice were  
556 treated as described in Fig. 3A.

557 (B-C) Percentages and absolute number of Foxp3<sup>+</sup>CD4<sup>+</sup> cells in the injected (B) and non-injected  
558 (C) tumors. Data are means  $\pm$  SD ( $n=6-8$ ;  $**P < 0.01$ ,  $***P < 0.001$ ,  $****P < 0.0001$ ,  $t$  test).

559 (D-F) Mice were intradermally implanted with B16-F10 cells. Tumors were injected with rMVA  
560 or PBS as control after 7 days post implantation and harvested 2-days post injection.

561 (D) Representative flow cytometry plots of cleaved caspase-3<sup>+</sup> Tregs in the injected tumors.

562 (E) Percentages of cleaved caspase-3 in tumor infiltrating-Tregs by flow cytometry. Data are  
563 means  $\pm$  SD ( $n=3-5$ ;  $**P < 0.01$ ,  $t$  test).

564 (F) Schematic diagram of IT rMVA in the presence or absence of DT in a unilateral B16-F10  
565 melanoma implantation model in Foxp3<sup>DTR</sup> mice.

566 (G) Tumor growth curves of mice treated with rMVA or PBS.

567 (H) Kaplan-Meier survival curves of mice treated with rMVA or PBS ( $n=5-10$ ;  $**P < 0.01$ ,  
568 *Mantel-Cox test*).

**Figure 5**

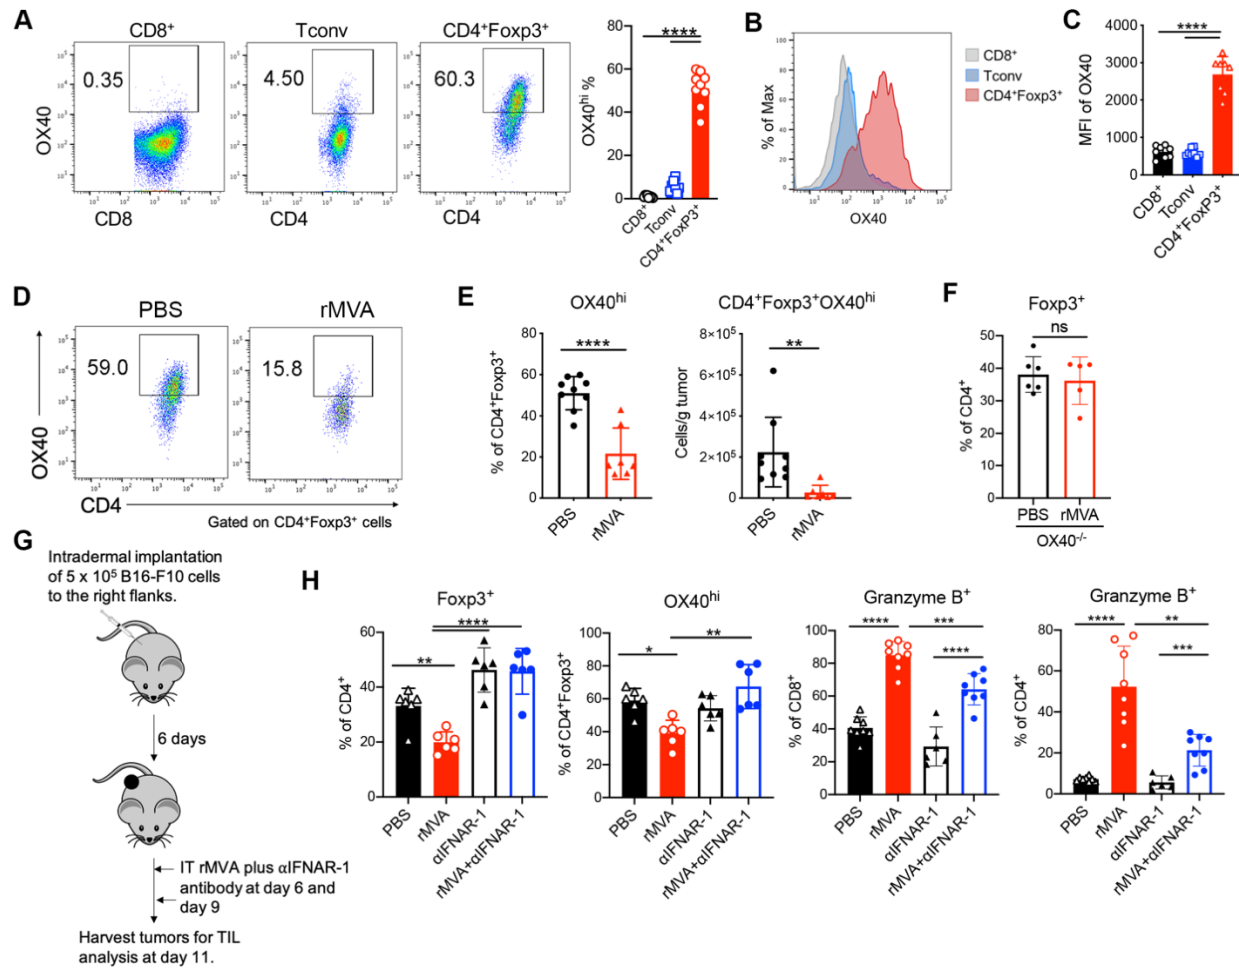

569 **Figure 5. IT rMVA preferentially depletes OX40<sup>hi</sup> Tregs in the injected tumors in a type I**  
570 **IFN signaling dependent manner.**  
571 (A) Representative flow cytometry plots of OX40 expression on tumor infiltrating CD8<sup>+</sup>, Tconv,  
572 and CD4<sup>+</sup>Foxp3<sup>+</sup> T cells in tumors 15 days after implantation. Mice were treated as described in  
573 Fig. 3A.  
574 (B-C) Representative flow cytometry plots and statistical analysis of mean fluorescence intensity  
575 of OX40 on tumor-infiltrating CD8<sup>+</sup>, Tconv, and CD4<sup>+</sup>Foxp3<sup>+</sup> T cells. Data are means ± SD in  
576 (C) ( $n=6\sim 8$ ; \*\*\*\* $P < 0.0001$ ,  $t$  test).  
577 (D) Representative flow cytometry plots of OX40<sup>hi</sup>CD4<sup>+</sup>Foxp3<sup>+</sup> in the injected tumors. Mice  
578 were treated as described in Fig. 3A.  
579 (E) Percentages and absolute number of OX40<sup>hi</sup>CD4<sup>+</sup>Foxp3<sup>+</sup> T cells in the injected tumors. Data  
580 are means ± SD ( $n=7$  or  $9$ ; \*\* $P < 0.01$ , \*\*\*\* $P < 0.0001$ ,  $t$  test).  
581 (F) Percentages of CD4<sup>+</sup>Foxp3<sup>+</sup> T cells in the injected tumors from WT and OX40<sup>-/-</sup> mice. Mice  
582 were treated as described in Fig. 3A. Data are means ± SD ( $n=5$  or  $6$ ;  $t$  test).  
583 (G) Schematic diagram of IT rMVA in the presence or absence of IT  $\alpha$ IFNAR-1 antibody in a  
584 unilateral B16-F10 melanoma implantation model.  
585 (H) Percentages of CD4<sup>+</sup>Foxp3<sup>+</sup> and OX40<sup>hi</sup>CD4<sup>+</sup>Foxp3<sup>+</sup> T cells in the injected tumors. Data are  
586 means ± SD ( $n=6$ ; \* $P < 0.05$ , \*\* $P < 0.01$ , \*\*\*\* $P < 0.0001$ ,  $t$  test).  
587 (I) Percentages of CD8<sup>+</sup>Granzyme B<sup>+</sup> and CD4<sup>+</sup>Granzyme B<sup>+</sup> T cells in the injected tumors.  
588 Data are means ± SD ( $n=6$ ; \*\* $P < 0.01$ , \*\*\* $P < 0.001$ , \*\*\*\* $P < 0.0001$ ,  $t$  test).  
589

**Figure 6**

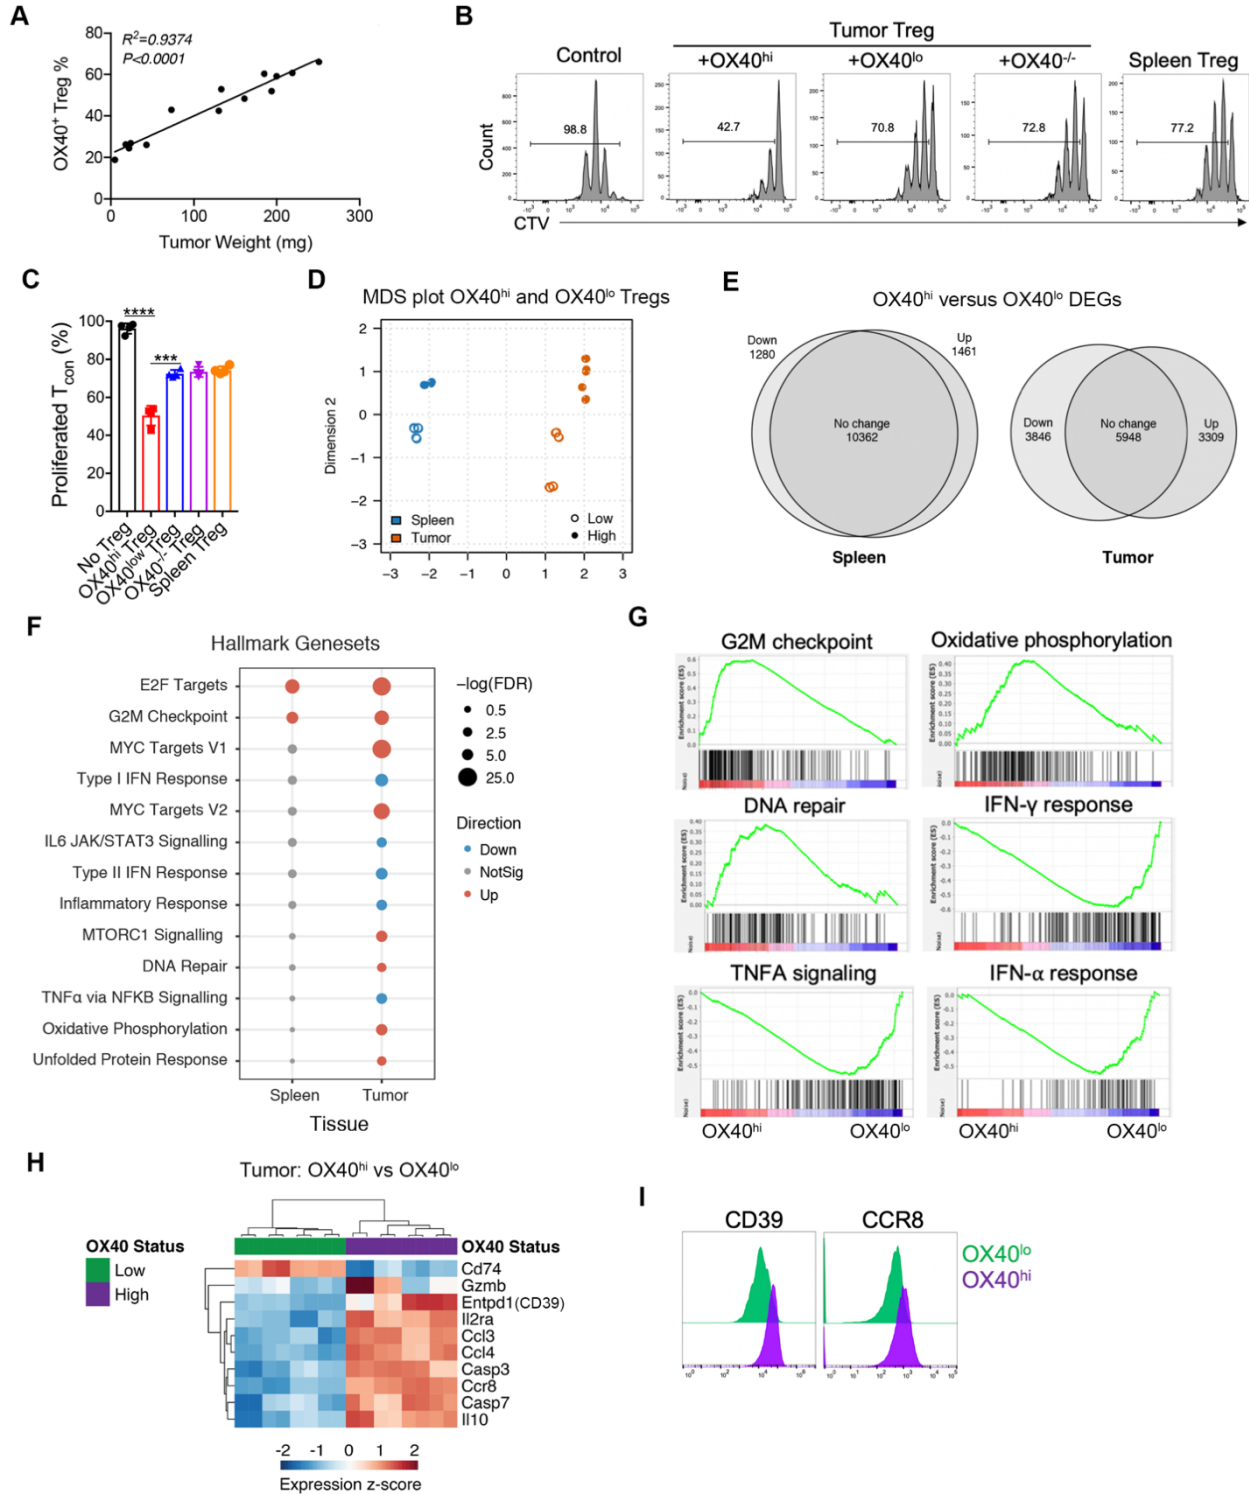

590 **Figure 6. Tumor-infiltrating OX40<sup>hi</sup> Tregs and OX40<sup>low</sup> Tregs have distinctive tran-**  
591 **scriptomic features.**

592 (A) Correlation of the percentages of OX40<sup>hi</sup> Tregs in the tumors with tumor weight. Mice were  
593 implanted with B16-F10 tumors intradermally. Tumors with different sizes were analyzed for  
594 OX40 expression on tumor-infiltrating Tregs.

595 (B-C) Representative flow cytometry plots (B) and percentage of T<sub>con</sub> proliferation (C) as meas-  
596 ured by CTV dye dilution co-cultured with tumor OX40<sup>hi</sup>, OX40<sup>low</sup>, OX40<sup>-/-</sup> Tregs or spleen  
597 Tregs. Data are means ± SD in (C) (\*\**P* < 0.001; \*\*\*\**P* < 0.0001, *t test*).

598 (D) Multidimensional scaling (MDS) plot of RNA-seq results of OX40<sup>hi</sup> and OX40<sup>low</sup> Tregs  
599 from B16-F10 tumors.

600 (E) Venn diagram of the relationship of differential gene expression (DEGs) of OX40<sup>hi</sup> Tregs vs.  
601 OX40<sup>lo</sup> Tregs isolated from spleens and tumors.

602 (F) Gene set analysis of upregulated or downregulated genes comparing OX40<sup>hi</sup> Tregs vs.  
603 OX40<sup>lo</sup> Tregs isolated from spleens and tumors.

604 (G) Gene Set Enrichment Analysis (GSEA) of upregulated or downregulated genes comparing  
605 transcriptomes of OX40<sup>hi</sup> Tregs vs. OX40<sup>lo</sup> Tregs isolated from tumors.

606 (H) Heatmap of selected genes upregulated or downregulated genes in OX40<sup>hi</sup> Tregs vs. OX40<sup>lo</sup>  
607 Tregs isolated from tumors.

608 (I) Representative FACS plot showing the expressions of CD39 and CCR8 on OX40<sup>hi</sup> Tregs and  
609 OX40<sup>lo</sup> Tregs isolated from tumors.

**Figure 7**

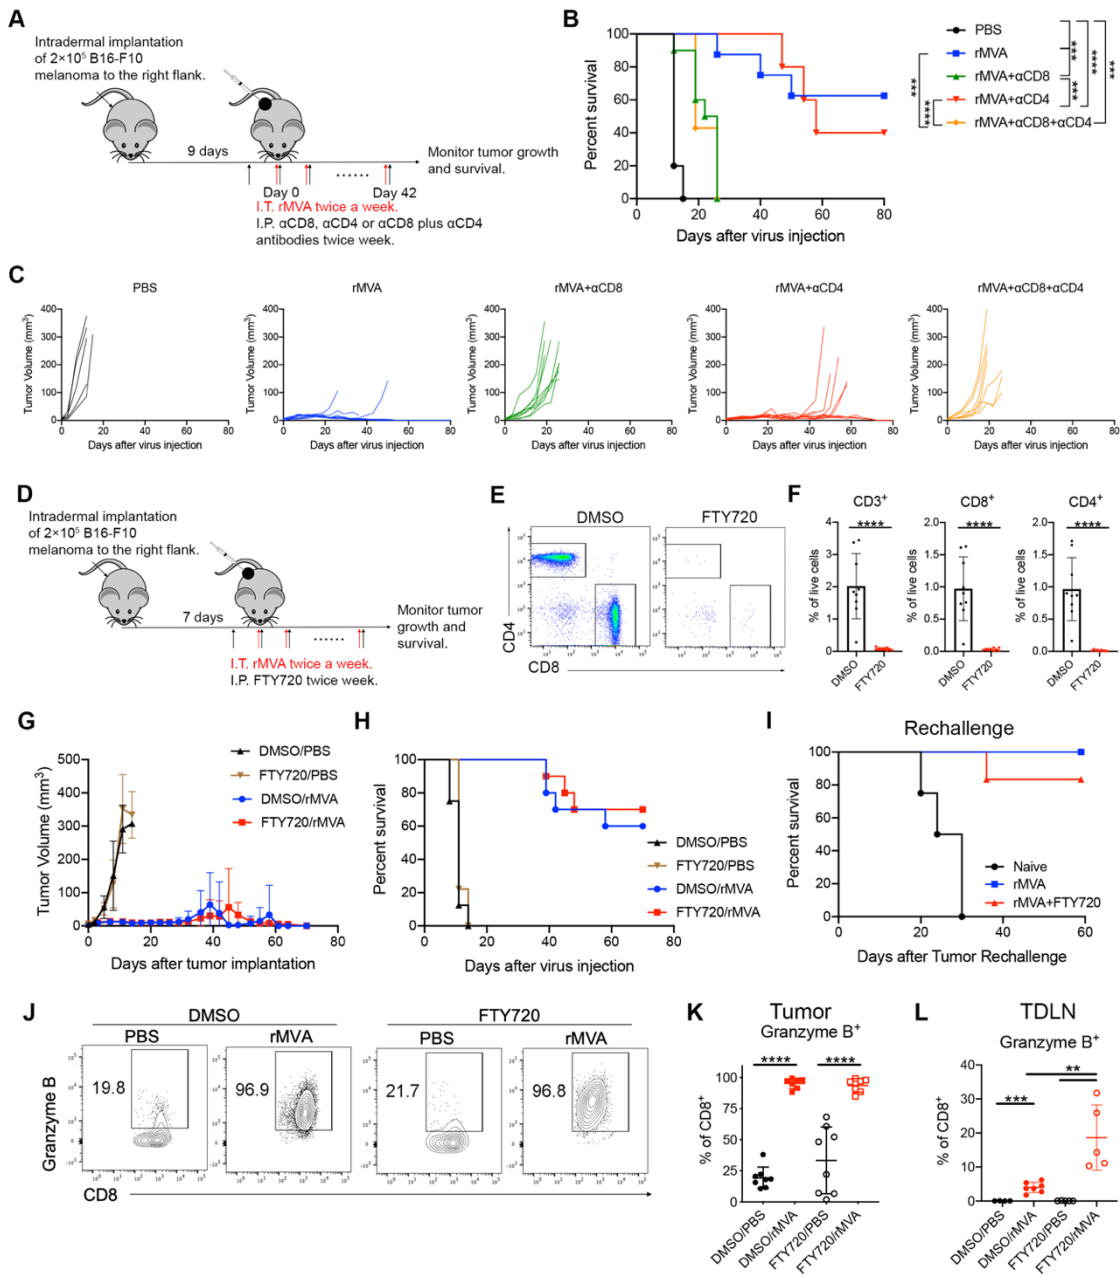



610 **Figure 7. Local activation of CD8<sup>+</sup> T cells is sufficient for rMVA-mediated tumor eradica-**  
611 **tion.**

612 (A) Schematic diagram of IT rMVA in the presence or absence of depleting antibodies for CD8  
613 and/or CD4 in a unilateral B16-F10 melanoma implantation model.

614 (B) Kaplan-Meier survival curves ( $n=5\sim 10$ ;  $***P < 0.001$ ,  $****P < 0.0001$ , *Mantel-Cox test*).

615 (C) Tumor growth curves.

616 (D) Schematic diagram of IT rMVA in the presence or absence of FTY720 in a unilateral B16-  
617 F10 melanoma implantation model.

618 (E) Representative flow cytometry plot of CD8<sup>+</sup> and CD4<sup>+</sup> T cells in the PBL of mice treated  
619 with FTY720.

620 (F) Percentages of CD8<sup>+</sup> and CD4<sup>+</sup> T cells in the PBL of mice treated with FTY720. Data are  
621 means  $\pm$  SD ( $n=10$ ;  $****P < 0.0001$ , *t test*).

622 (G) Tumor growth curves.

623 (H) Kaplan-Meier survival curves ( $n=10$ ).

624 (I) Kaplan-Meier survival curves of survived mice from (H) or naïve mice challenged with  $1 \times 10^5$   
625 B16-F10 cells at the contralateral side ( $n=5$  or  $6$ ).

626 (J) Representative flow cytometry plots of Granzyme B<sup>+</sup>CD8<sup>+</sup> T cells in the injected tumors.

627 (K) Percentages of Granzyme B<sup>+</sup>CD8<sup>+</sup> T cells in the injected tumors. Data are means  $\pm$  SD ( $n=8$ ;  
628  $****P < 0.0001$ , *t test*).

629 (L) Percentages of Granzyme B<sup>+</sup>CD8<sup>+</sup> T cells in the tumor-draining lymph nodes. Data are  
630 means  $\pm$  SD ( $n=6\sim 8$ ;  $**P < 0.01$ ,  $***P < 0.001$ , *t test*).

**Figure 8**

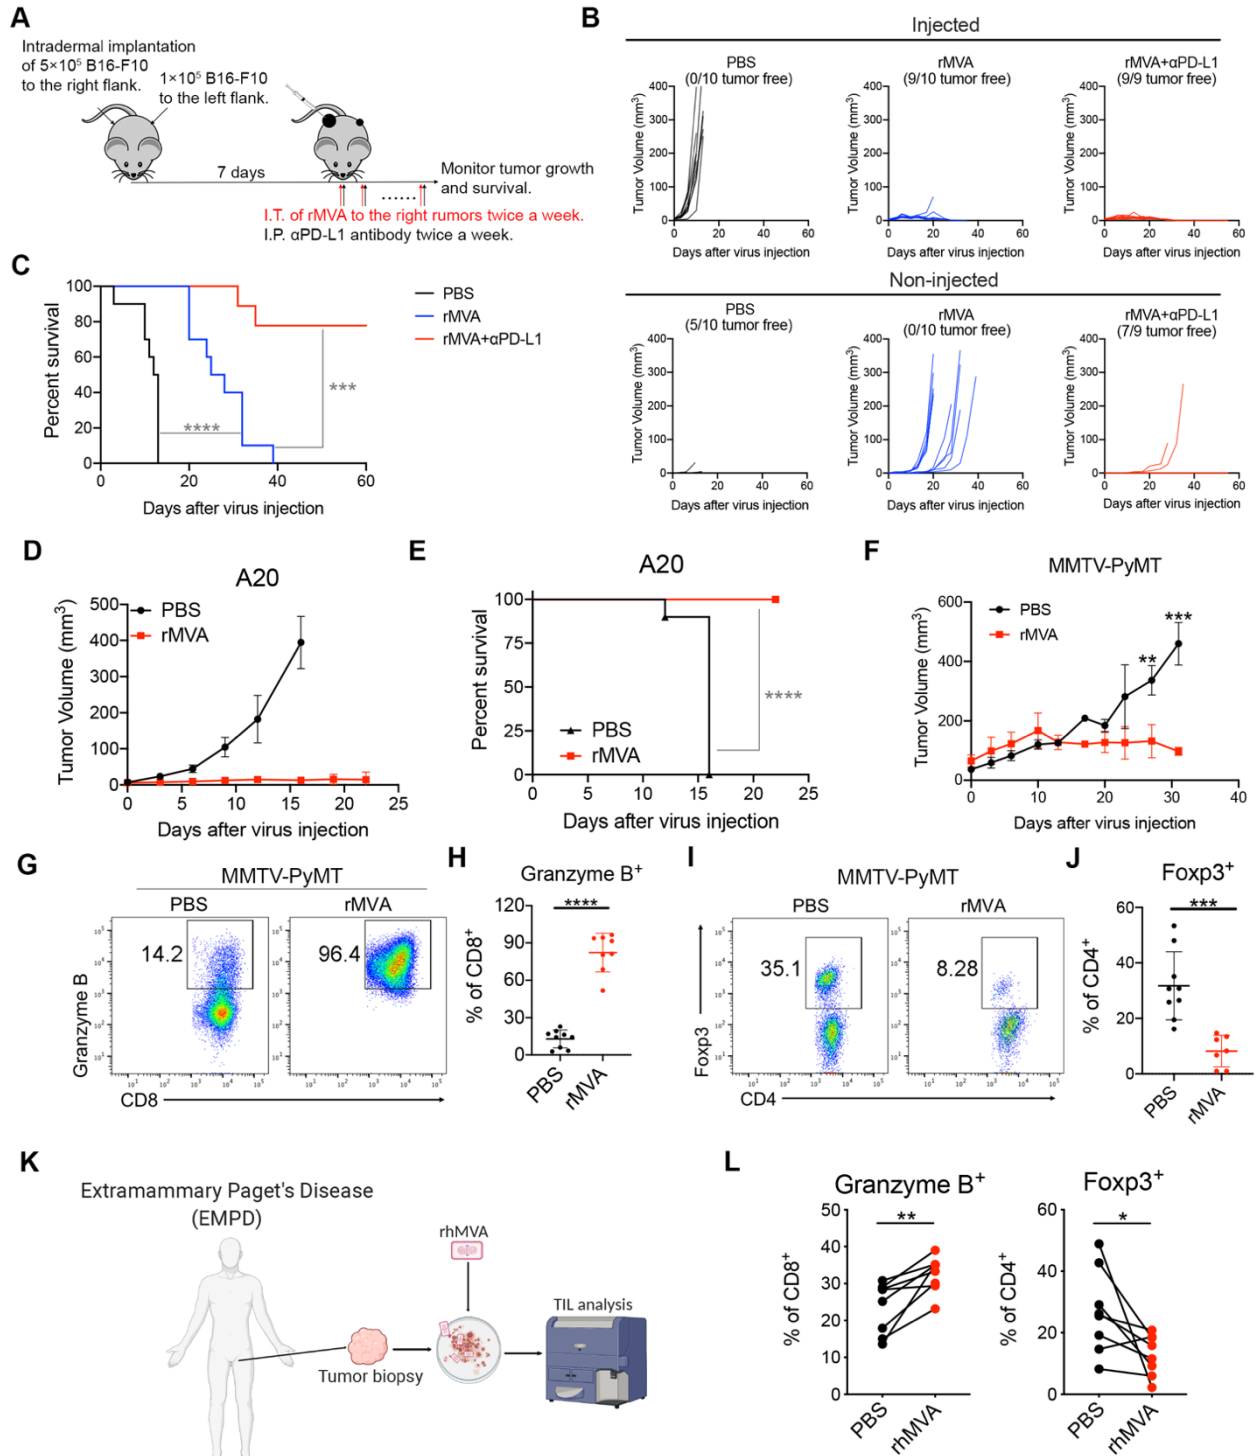

631 **Figure 8. IT rMVA elicits strong antitumor immunity in multiple murine tumor models.**  
632 (A) Schematic diagram of IT rMVA in combination with IP  $\alpha$ PD-L1 antibody in a bilateral B16-  
633 F10 melanoma implantation model.  
634 (B) Tumor growth curves.  
635 (C) Kaplan-Meier survival curves ( $n=9$  or  $10$ ; \*\*\*\*  $P < 0.0001$ , *Mantel-Cox test*).  
636 (D) Tumor growth curves of mice treated with IT rMVA in an A20 B cell lymphoma implanta-  
637 tion model.  
638 (E) Kaplan-Meier survival curves ( $n=10$ ; \*\*\*\*  $P < 0.0001$ , *Mantel-Cox test*).  
639 (F) Tumor growth curves in the PyMT-MMTV breast tumor model. Data are means  $\pm$  SD ( $n=5$ ;  
640 \*\* $P < 0.01$ , \*\*\* $P < 0.001$ , *t test*).  
641 (G) Representative flow cytometry plots of Granzyme B<sup>+</sup>CD8<sup>+</sup> T cells in the IT rMVA-treated  
642 tumors from MMTV-PyMT mice.  
643 (H) Percentages of Granzyme B<sup>+</sup>CD8<sup>+</sup> T cells in the injected tumors. Data are means  $\pm$  SD  
644 ( $n=8$ ; \*\*\*\* $P < 0.0001$ , *t test*).  
645 (I) Representative flow cytometry plots of Foxp3<sup>+</sup>CD4<sup>+</sup> T cells in the injected tumors.  
646 (J) Percentages of Foxp3<sup>+</sup>CD4<sup>+</sup> T cells in the injected tumors. Data are means  $\pm$  SD ( $n=8$ ; \*\*\* $P$   
647  $< 0.001$ , *t test*).  
648 (K) Schematic diagram of ex vivo infection of human EMPD tumors with rhMVA.  
649 (L) Percentages of Granzyme B<sup>+</sup>CD8<sup>+</sup> T cells and Foxp3<sup>+</sup>CD4<sup>+</sup> T cells in the rhMVA-treated  
650 and non-treated tumor tissues. Data are means  $\pm$  SD ( $n=7$ ; \* $P < 0.05$ , \*\* $P < 0.01$ , *t test*).

## STAR Methods

### KEY RESOURCES TABLE

| REAGENT or RESOURCE                                      | SOURCE        | IDENTIFIER                        |
|----------------------------------------------------------|---------------|-----------------------------------|
| Antibodies                                               |               |                                   |
| BUV395 anti-mouse CD45 (clone 30-F11)                    | BD            | Cat#564279; RRID: AB_2651134      |
| PE/Cy7 anti-mouse CD3 (clone 145-2C11)                   | BioLegend     | Cat#100320; RRID: AB_312685       |
| Pacific Blue anti-mouse CD4 (clone GK1.5)                | BioLegend     | Cat#100428; RRID: AB_493647       |
| PerCP/Cy5.5 anti-mouse CD8 (clone 53-5.8)                | BioLegend     | Cat#140418; RRID: AB_2800651      |
| APC anti-mouse Foxp3 (clone 236A/E7)                     | Thermo Fisher | Cat#17-4777-42; RRID: AB_10804651 |
| PE anti-mouse OX40 (clone OX-86)                         | BioLegend     | Cat#119409; RRID: AB_2272150      |
| Alexa Fluor 647 anti-mouse OX40L (clone RM134L)          | BioLegend     | Cat#108810; RRID: AB_2207379      |
| BV421 anti-human OX40L (clone iK-1)                      | BD            | Cat#563766; RRID: AB_2738412      |
| Alexa Fluor 488 anti-mouse IFN $\gamma$ (clone XMG1.2)   | BioLegend     | Cat#505813; RRID: AB_493312       |
| Alexa Fluor 700 anti-mouse TNF $\alpha$ (clone MP6-XT22) | BioLegend     | Cat#506338; RRID: AB_2562918      |
| APC-eFluor 780 anti-mouse CD11b (clone M1/70)            | Thermo Fisher | Cat#47-0112-82; RRID: AB_1603193  |
| Alexa Fluor 700 anti-mouse CD11c (clone N418)            | BioLegend     | Cat#117320; RRID: AB_528736       |
| PerCP/Cyanine5.5 anti-mouse Ly-6G (clone HK1.4)          | BioLegend     | Cat#128012; RRID: AB_1659241      |
| Brilliant Violet 570 anti-mouse Ly-6G (clone 1A8)        | BioLegend     | Cat#127629; RRID: AB_10899738     |
| PerCP/Cyanine5.5 anti-mouse F4/80 (clone BM8)            | Thermo Fisher | Cat#45-4801-82; RRID: AB_914345   |
| Brilliant Violet 605 anti-mouse NK1.1 (clone PK136)      | BioLegend     | Cat#108753; RRID: AB_2686977      |
| Pacific Blue anti-mouse B220 (clone RA3-682)             | BioLegend     | Cat#103227; RRID: AB_492876       |
| Brilliant Violet 711 anti-mouse CD103 (clone 2E7)        | BioLegend     | Cat#121435; RRID: AB_2686970      |
| PE anti-mouse CD24 (clone: M1/69)                        | Thermo Fisher | Cat#12-0242-83; RRID: AB_465603   |
| eFluor450 anti-mouse MHC-II (clone: M5/114.15.2)         | Thermo Fisher | Cat#48-5321-80; RRID: AB_1272241  |
| APC/Cyanine7 anti-mouse CD86 (clone: GL-1)               | BioLegend     | Cat#105030; RRID: AB_2244452      |
| Alexa Fluor 647 Goat anti-mouse IgG                      | Thermo Fisher | Cat#A21235; RRID: AB_2535804      |
| Mouse anti-human Flt3LG                                  | Thermo Fisher | Cat#MA5-23827, RRID: AB_2608656   |
| PE Texas Red anti-human Granzyme B (clone: GB11)         | Thermo Fisher | Cat#GRB17; RRID: AB_2536540       |

|                                                           |                                              |                                   |
|-----------------------------------------------------------|----------------------------------------------|-----------------------------------|
| Alexa Fluor 700 anti-human CD45 (clone: HI30)             | BioLegend                                    | Cat#304024; RRID: AB_493761       |
| PE/Cyanine7 anti-human CD3 (clone: OKT3)                  | BioLegend                                    | Cat#317334; RRID: AB_2561452      |
| PerCP/Cyanine5.5 anti-human CD8 (clone: HIT8a)            | BioLegend                                    | Cat#300924; RRID: AB_1575074      |
| Pacific Blue anti-human CD4(clone: OKT4)                  | BioLegend                                    | Cat#317424; RRID: AB_571953       |
| APC anti-human Foxp3 (clone: 236A/E7)                     | Thermo Fisher                                | Cat#17-4777-42; RRID: AB_10804651 |
| Alexa Fluor 647 anti-human CD86 (clone: IT2.2)            | BioLegend                                    | Cat#305416; RRID: AB_528883       |
| PE Anti-human OX40 (Ber-ACT35)                            | BioLegend                                    | Cat#350004; RRID: AB_10645478     |
| Anti-mouse CD3 $\epsilon$ (clone: 145-2C11)               | BioLegend                                    | Cat#100302; RRID: AB_312667       |
| Anti-mouse IFNAR-1 (Clone MAR1-5A3)                       | Bio X Cell                                   | Cat#BE0241; RRID: AB_2687723      |
| Anti-mouse PD-L1 (Clone 10F.9G2)                          | Bio X Cell                                   | Cat#BE0101; RRID: AB_10949073     |
| Anti-mouse CD8 $\alpha$ (Clone 2.43)                      | Bio X Cell                                   | Cat#BE0061; RRID: AB_1125541      |
| Anti-mouse CD4 (Clone GK1.5)                              | Bio X Cell                                   | Cat#BE0003-1; RRID: AB_1107636    |
| <b>Bacterial and Virus Strains</b>                        |                                              |                                   |
| MVA                                                       | provided by G. Sutter (University of Munich) | N/A                               |
| MVA $\Delta$ E5R                                          | This paper                                   | N/A                               |
| rMVA                                                      | This paper                                   | N/A                               |
| rhMVA                                                     | This paper                                   | N/A                               |
| MVA $\Delta$ E5R-hFit3L                                   | This paper                                   | N/A                               |
| MVA $\Delta$ E5R-mOX40L                                   | This paper                                   | N/A                               |
| <b>Biological Samples</b>                                 |                                              |                                   |
| Human EMPD samples                                        | Dermatology Service, MSKCC                   | N/A                               |
| <b>Chemicals, Peptides, and Recombinant Proteins</b>      |                                              |                                   |
| Eagle's minimal essential medium                          | Life Technologies                            | Cat#11095-080                     |
| RPMI-1640                                                 | Corning                                      | Cat#10-041-CV                     |
| Fetal bovine serum                                        | Corning                                      | Cat#35-010-CV                     |
| Penicillin/Streptomycin                                   | Corning                                      | Cat#400-109                       |
| PBS                                                       | Corning                                      | Cat#21-040-CV                     |
| EDTA                                                      | Invitrogen                                   | Cat#15575-038                     |
| ACK lysis buffer                                          | Lonza                                        | Cat#10-548E                       |
| Trypsin                                                   | Corning                                      | Cat#25-052-CI                     |
| PowerUp <sup>TM</sup> SYBR <sup>TM</sup> Green Master Mix | Thermo Fisher                                | Cat#A25776                        |
| FTY720                                                    | Selleckchem                                  | Cat#S5002                         |
| Diphtheria toxin                                          | Sigma-Aldrich                                | Cat#D0564                         |
| Liberase <sup>TM</sup> TL                                 | Roche                                        | Cat#5401020001                    |
| Collagenase D                                             | Roche                                        | Cat#11088866001                   |
| DNase I                                                   | Sigma-Aldrich                                | Cat#11284932001                   |

|                                                                                      |                         |                                        |
|--------------------------------------------------------------------------------------|-------------------------|----------------------------------------|
| CD11c MicroBeads                                                                     | Miltenyi Biotec         | Cat#130-125-835                        |
| LIVE/DEAD™ Fixable Aqua Stain                                                        | Thermo Fisher           | Cat#L34965                             |
| Zombie Nir cell viability dye                                                        | BioLegend               | Cat#423106                             |
| CellTrace™ Violet                                                                    | Thermo Fisher           | Cat#C34557                             |
| Cell stimulation cocktail                                                            | Thermo Fisher           | Cat#00-4970-93                         |
| recombinant mouse GM-CSF                                                             | BioLegend               | Cat#576304                             |
| recombinant human GM-CSF                                                             | PeproTech               | Cat#300-03                             |
| recombinant human IL-4                                                               | PeproTech               | Cat#200-04                             |
| Puromycin                                                                            | Sigma                   | Cat#P9620                              |
| Gateway BP Clonase II Enzyme mix                                                     | Thermo Fisher           | Cat#11789100                           |
| Gateway LR Clonase II Enzyme mix                                                     | Thermo Fisher           | Cat#11791020                           |
| One Shot OmniMax 2T1 Chemically Competent                                            | Thermo Fisher           | Cat#C854003                            |
| Gibson Assembly Master Mix                                                           | NEB                     | Cat#E2600L                             |
| NEB 10-beta Competent E. coli                                                        | NEB                     | Cat#E3019I                             |
| Critical Commercial Assays                                                           |                         |                                        |
| RNeasy Plus mini kit                                                                 | Qiagen                  | Cat#74136                              |
| RNeasy Plus micro kit                                                                | Qiagen                  | Cat#74034                              |
| cDNA synthesis kit                                                                   | Thermo Fisher           | Cat#AB1453B                            |
| Mouse IFNβ ELISA kit                                                                 | PBL                     | Cat#42400-1                            |
| Foxp3/Transcription factor fixation and permeabilization kit                         | Thermo Fisher           | Cat#00-5523-00                         |
| Mouse IFN-γ ELISpot Set                                                              | BD Biosciences          | Cat#551083                             |
| Deposited Data                                                                       |                         |                                        |
| Raw data for bulk-tumor RNA-seq                                                      |                         |                                        |
| Processed data for bulk-tumor RNA-seq                                                |                         |                                        |
| Raw data for Treg RNA-seq                                                            |                         |                                        |
| Processed data for Treg RNA-seq                                                      |                         |                                        |
| Experimental Models: Cell Lines                                                      |                         |                                        |
| BHK-21                                                                               | ATCC                    | Cat#CCL-10                             |
| B16-F10                                                                              | I. Fidler (MD Anderson) |                                        |
| B16-F10-mOX40L                                                                       | This paper              | N/A                                    |
| B16-F10-hFit3L                                                                       | This paper              | N/A                                    |
| A20                                                                                  | ATCC                    |                                        |
| SK-MEL-28                                                                            | MSKCC                   |                                        |
| Experimental Models: Organisms/Strains                                               |                         |                                        |
| Mouse: C57BL/6J                                                                      | The Jackson Laboratory  | stock#000664;<br>RRID: IMSR_JAX:000664 |
| Mouse: BALB/cJ                                                                       | The Jackson Laboratory  | stock#00651                            |
| Mouse: cGAS <sup>-/-</sup> (B6(C)- <i>Cgas</i> <sup>tm1d(EUCOMM)Hmgu/J</sup> )       | The Jackson Laboratory  | RRID: IMSR_JAX:026554                  |
| Mouse: STING <sup>Gt/Gt</sup>                                                        | (Sauer et al., 2011)    | RRID: IMSR_JAX:024101                  |
| Mouse: Foxp3 <sup>gfp</sup>                                                          |                         |                                        |
| Mouse: Foxp3 <sup>DTR</sup> (B6.129(Cg)- <i>Foxp3</i> <sup>tm3(DTR/GFP)Ayr/J</sup> ) | The Jackson Laboratory  | Stock#016958                           |
| Mouse: STAT2 <sup>-/-</sup> (B6.129- <i>Stat2</i> <sup>tm1Shnd/J</sup> )             | The Jackson Laboratory  | RRID: IMSR_JAX:023309                  |

|                                   |                         |                                |
|-----------------------------------|-------------------------|--------------------------------|
| Mouse: STAT1 <sup>-/-</sup>       | (Fontenot et al., 2005) |                                |
| Mouse: OX40 <sup>-/-</sup>        | Jackson laboratory      |                                |
| Mouse: MMTV-PyMT                  | Dr. Ming Li             |                                |
| Oligonucleotides                  |                         |                                |
| Primers for qRT-PCR, see Table S1 |                         | N/A                            |
| Recombinant DNA                   |                         |                                |
| Plasmid: pUC57-mCherry            | This paper              | N/A                            |
| Plasmid: pUC57-hFlt3L             | This paper              | N/A                            |
| Plasmid: pUC57-mOX40L             | This paper              | N/A                            |
| Plasmid: pUC57-hFlt3L-mOX40L      | This paper              | N/A                            |
| Plasmid: pUC57-hFlt3L-hOX40L      | This paper              | N/A                            |
| Plasmid: pQCXIP-mOX40L            | This paper              | N/A                            |
| Plasmid: pQCXIP-hFlt3L            | This paper              | N/A                            |
| Plasmid: pMD2.G                   | Addgene                 | Cat#12259; RRID: Addgene_12259 |
| Plasmid: gag/pol                  | Addgene                 | Cat#14887; RRID: Addgene_14887 |
| Plasmid: pQCXIP                   | Addgene                 | Cat#17474; RRID: Addgene_17474 |
| Plasmid: pDONR <sup>TM</sup> 221  | Thermo Fisher           | Cat#12536017                   |
| Software and Algorithms           |                         |                                |
| FlowJo v.10.5.3                   | BD                      | RRID: SCR_008520               |
| GraphPad Prism 8                  | GraphPad                | RRID: SCR_002798               |
| bcl2fastq 2.19                    | Illumina                | RRID:SCR_015058                |
| cutadapt (V1.18)                  | github                  | RRID:SCR_011841                |
| STAR (V2.5.2)                     | github                  | RRID:SCR_004463                |
| Cufflinks (V2.1.1)                | github                  | RRID:SCR_014597                |
| DESeq2                            | bioconductor            | RRID:SCR_015687                |
| GSEA (V4.0.3)                     | Broad Institute         | RRID:SCR_003199                |
| Other                             |                         |                                |
|                                   |                         |                                |

651 **Resource availability**

652 **Lead Contact**

653

654 Further information and requests for resources and reagents used in this study should be directed  
655 to and will be fulfilled by the lead contact and the corresponding author, Liang Deng  
656 ([dengl@mskcc.org](mailto:dengl@mskcc.org)).

657

658 **Materials availability**

659

660 The materials used in this study are listed in the Key Resources Table. Materials generated in our  
661 laboratory are available upon request.

662

663 **Data and code availability**

664 The RNA-seq data reported in this study have been deposited in the Gene Expression Omnibus  
665 database (GEO) under the accession number GEO: ---. We analyzed the RNA-seq data ---

666

667 **Materials and Methods**

668 **Cell lines**

669 BHK-21 (baby hamster kidney cell, ATCC CCL-10) cells were cultured in Eagle's minimal es-  
670 sential medium containing 10% fetal bovine serum (FBS), 0.1 mM nonessential amino acids,  
671 penicillin, and streptomycin. The murine melanoma cell line B16-F10 was originally obtained  
672 from I. Fidler (MD Anderson Cancer Center). The A20 B cell lymphoma cell line were obtained  
673 from ATCC. Both B16-F10 and A20 were maintained in RPMI-1640 medium supplemented  
674 with 10% FBS, 0.05 mM 2-mercaptoethanol, penicillin, and streptomycin.

675 B16 cell line expressing murine OX40L (mOX40L) or human Flt3l (fFlt3l) were created by  
676 transduction into B16 cells with vesicular stomatitis virus (VSV) G protein-pseudotyped murine  
677 leukemia viruses (MLV) containing pQCXIP-mOX40L or pQCXIP-fFlt3l. Cells were selected  
678 and maintained in growth media including 2 µg/ml puromycin for selection of stably transduced  
679 cells.

680

681 **Viruses**

682 The MVA virus was provided by G. Sutter (University of Munich). MVA $\Delta$ E5R, MVA $\Delta$ E5R-  
683 hFlt3L, MVA $\Delta$ E5R-mOX40L, rMVA and rhMVA were generated by transfecting pUC57-based  
684 plasmids into BHK-21 cells that were infected with MVA at MOI 0.05. Recombinant viruses



685 were purified after 4~6 rounds of plaque selection based on the fluorescence marker. Viruses  
686 were propagated in BHK-21 cells and purified through a 36% sucrose cushion.

687

## 688 **Mice**

689 Female C57BL/6J mice and BALB/cJ between 6 and 10 weeks of age were purchased from the  
690 Jackson Laboratory (stock #000664 and stock #000651) were used for the preparation of  
691 BMDCs and for *in vivo* experiments. These mice were maintained in the animal facility at the  
692 Sloan Kettering Institute. All procedures were performed in strict accordance with the recom-  
693 mendations in the Guide for the Care and Use of Laboratory Animals of the National Institutes of  
694 Health. The protocol was approved by the Committee on the Ethics of Animal Experiments of  
695 Sloan Kettering Cancer Institute. STING<sup>Gt/Gt</sup> mice were generated in the laboratory of Dr. Rus-  
696 sell Vance (University of California, Berkeley). Foxp3<sup>gfp</sup> and Foxp3<sup>DTR</sup> mice were generated in  
697 the laboratory of Dr. Alexander Y. Rudensky (Memorial Sloan Kettering Cancer Center).  
698 MMTV-PyMT mice were provided by Ming Li (Memorial Sloan Kettering Cancer Center).  
699 cGAS<sup>-/-</sup> mice were generated in Herbert (Skip) Virgin's laboratory (Washington University).  
700 STAT1<sup>-/-</sup>, STAT2<sup>-/-</sup> and OX40<sup>-/-</sup> were purchased from Jackson Laboratory. OX40<sup>-/-</sup>Foxp3<sup>gfp</sup> mice  
701 were generated in our lab.

702

## 703 **TIL isolation and flow cytometry**

704 For TIL or myeloid cells analysis, tumors were minced prior to incubation with Liberase (1.67  
705 Wünsch U/ml) and DNaseI (0.2 mg/ml) for 30 min at 37°C. Tumors were then homogenized by  
706 gentleMACS dissociator and filtered through a 70-µm nylon filter. Cell suspensions were  
707 washed and resuspended with complete RPMI. For cytokine production analysis, cells were res-  
708 timulated with Cell Stimulation Cocktail (Thermo Fisher) and GolgiPlug (BD Biosciences) in  
709 complete RPMI for 6 h at 37°C. Cells were incubated with appropriate antibodies for surface la-  
710 beling for 30 min at 4°C after staining dead cells with LIVE/DEAD™ Fixable Aqua Stain  
711 (Thermo Fisher). Cells were fixed and permeabilized using Foxp3 fixation and permeabilization  
712 kit (Thermo Fisher) for 1 hour at 4°C and then stained for Granzyme B, Foxp3, IFNγ and TNFα.  
713 To analyze transgene expression, cells were infected with various viruses at a MOI of 10 or mock-  
714 infected. At 24 h post infection, cells were collected and the cell viability was determined by la-  
715 beling with LIVE/DEAD™ Fixable Aqua Stain (Thermo Fisher) 15 min at 4°C. Cells were then

716 sequentially stained with hFlt3L primary antibody, PE-conjugated goat-anti-mouse IgG antibody  
717 and AF647-conjugated anti-mOX40L antibody at 4°C, 15 min for each step.

718 For dendritic cell maturation assay, cells were infected with virus at a MOI of 10 and collected at  
719 16 h post infection. Then cells were stained with anti-CD86 antibody for surface labeling for 30  
720 min at 4 °C. LIVE/DEAD™ Fixable Aqua Stain (Thermo Fisher) was used to stain dead cells.  
721 Cells were analyzed using the BD LSRFortessa flow cytometer (BD Biosciences). Data were an-  
722 alyzed with FlowJo software (Treestar).

723

### 724 **RNA isolation and Real-time PCR**

725 For the generation of BMDCs, the bone marrow cells (5 million cells in each 15 cm cell culture  
726 dish) were cultured in RPMI-1640 medium supplemented with 10% fetal bovine serum (FBS) in  
727 the presence of 30 ng/ml GM-CSF (BioLegend) for 10-12 days.

728 To generate human monocyte-derived dendritic cells, peripheral blood mononuclear cells  
729 (PBMC) were prepared by centrifugation on a Ficoll gradient. Monocytes layer was collected  
730 and plated to tissue culture dish. After 1 h, non-adherent cells were washed off. The remaining  
731 cells were cultured for 5-7 days in RPMI-1640 supplemented with antibiotics (penicillin and  
732 streptomycin) and 10% FCS in the presence of 1000 IU/ml GM-CSF (PeproTech) and 500 IU/ml  
733 IL-4 (PeproTech).

734

735 Cells were infected with various viruses at a MOI of 10 for 1 hour or mock-infected. The inocu-  
736 lum was removed, and the cells were washed with PBS twice and incubated with fresh medium.  
737 RNA was extracted from whole-cell lysates with RNeasy Plus Mini kit (Qiagen) and was re-  
738 verse-transcribed with cDNA synthesis kit (Thermo Fisher). Real-time PCR was performed in  
739 triplicate with SYBR Green PCR Master Mix (Life Technologies) and Applied Biosystems 7500  
740 Real-time PCR Instrument (Life Technologies) using gene-specific primers. Relative expression  
741 was normalized to the levels of glyceraldehyde-3-phosphate dehydrogenase (GAPDH). The pri-  
742 mer sequences for quantitative real-time PCR are listed in [Table S1](#).

743

### 744 **Tumor challenge and treatment**

745 For tumor immune cells analysis, B16-F10 cells were implanted intradermally into right and left  
746 flanks of the mice ( $5 \times 10^5$  to the right flank and  $2.5 \times 10^5$  to the left flank). At 7 to 9 days after

747 implantation, the tumors at the right flank were injected with  $4 \times 10^7$  PFU of rMVA, MVA $\Delta$ E5R  
748 or PBS twice, 2 or 3 days apart. Tumors, spleens and/or tumor draining lymph nodes were har-  
749 vested two days after second injection. In some experiments, 50  $\mu$ g of  $\alpha$ IFNAR-1 antibody  
750 (MAR1-5A3, BioXcell) were injected into the tumors together with rMVA.

751  
752 For survival experiments,  $2 \times 10^5$  B16-F10 cells were implanted intradermally into the shaved  
753 skin on the right flank of WT C57BL/6J mice or age-matched cGAS $^{-/-}$ , STING $^{Gt/Gt}$ , STAT2 $^{-/-}$ ,  
754 STAT1 $^{-/-}$  mice. In some experiments,  $2 \times 10^5$  A20 cells were implanted intradermally into the  
755 right flank of WT BALB/cJ mice. At 6 to 9 days after implantation, tumor sizes were measured  
756 and tumors that are 3 mm in diameter or larger were injected with  $4 \times 10^7$  PFU of rMVA or PBS  
757 when the mice were under anesthesia. Viruses were injected twice weekly as specified in each  
758 experiment and tumor sizes were measured twice a week. Tumor volumes were calculated ac-  
759 cording to the following formula:  $l$  (length)  $\times$   $w$  (width)  $\times$   $h$  (height)/2. Mice were euthanized for  
760 signs of distress or when the diameter of the tumor reached 10 mm. For depletion of T cells, de-  
761 pletion antibodies for CD8 $^{+}$  and CD4 $^{+}$  cells (200  $\mu$ g of clone 2.43 and GK1.5, BioXcell) were  
762 injected intraperitoneally twice weekly starting 1 day before viral injection, and they were used  
763 until the animals either died, were euthanized, or were completely clear of tumors. In some ex-  
764 periments, 25  $\mu$ g of FTY720 diluted in 100  $\mu$ l deionized water was injected intraperitoneally  
765 twice weekly starting 1 day before viral injection.

766 For depletion of Tregs,  $2 \times 10^5$  B16-F10 cells were implanted intradermally into the shaved skin  
767 on the right flank of Foxp3 $^{DTR}$  mice. Diphtheria toxin (DT) were injected were injected intraperi-  
768 toneally twice weekly starting 1 day before viral injection, and they were used until the endpoint.

769 In the bilateral tumor implantation model, B16-F10 cells were implanted intradermally into right  
770 and left flanks of C57BL/6J mice ( $5 \times 10^5$  to the right flank and  $1 \times 10^5$  to the left flank). At 7 days  
771 after implantation, the tumors at the right flank were injected with  $4 \times 10^7$  PFU of rMVA or PBS.

772 250 $\mu$ g  $\alpha$ PD-L1 antibody (10F.9G2, BioXcell) was injected intraperitoneally twice weekly.

773 For the tumor rechallenge study, the survived mice (more than 40 days after initiation of intra-  
774 tumoral virotherapy) were rechallenged with intradermal delivery of a lethal dose of B16-F10  
775 ( $1 \times 10^5$  cells) at the contralateral side.

776

777 **ELISpot assay**

778 Spleens were mechanically disrupted by gentleMACS™ dissociator and red blood cells were  
779 lysed by ACK lysing buffer.  $1 \times 10^6$  splenocytes were co-cultured with  $2.5 \times 10^5$  irradiated B16-  
780 F10 in complete RPMI medium overnight. IFN $\gamma^+$  splenocytes were detected by Mouse IFN $\gamma$   
781 ELISPOT kit (BD Biosciences)

782

783 **In vitro Treg suppression assay**

784  $5 \times 10^5$  WT B16-F10 cells were implanted intradermally into the right and left flanks of Foxp3<sup>gfp</sup>  
785 and OX40<sup>-/-</sup>Foxp3<sup>gfp</sup> mice. Tumors and spleens were harvested when tumor sizes reached 5 mm  
786 in diameter or larger and processed into single cell suspensions as described above. Cells were  
787 stained with anti-CD45.2 (AF700), CD4 (Pacific Blue) and OX40 (PE) antibodies for 30 min at  
788 4 °C. LIVE/DEAD™ Fixable Aqua Stain (Thermo Fisher) was used to stain dead cells. Treg  
789 Cells were sorted into CD4<sup>+</sup>GFP<sup>+</sup>OX40<sup>hi</sup> and CD4<sup>+</sup>GFP<sup>+</sup>OX40<sup>lo</sup> populations. Naive CD4<sup>+</sup> T  
790 Cells were sorted from mouse spleen. Spleens from CD45.1 congenic mouse were harvested,  
791 chopped and digested with Collagenase D (2.5 mg/ml) and DNaseI (50  $\mu$ g/ml) for 30 min at  
792 37°C. CD11c<sup>+</sup> DCs were then isolated by CD11c MicroBeads (Miltenyi Biotec). CTV-labeled  
793  $4 \times 10^4$  native CD4<sup>+</sup> T cells were co-cultured with  $1 \times 10^5$  CD11c<sup>+</sup> DCs. Purified  
794 CD4<sup>+</sup>GFP<sup>+</sup>OX40<sup>hi</sup>, CD4<sup>+</sup>GFP<sup>+</sup>OX40<sup>lo</sup> or CD4<sup>+</sup>GFP<sup>+</sup>OX40<sup>-/-</sup> cells were seeded in indicated ratios  
795 and cultured in complete RPMI supplemented with 1  $\mu$ g/ml anti-CD3 antibody for 3 days. Cell  
796 were then collected and stained with APC anti-CD4 antibody for 30 min at 4 °C after staining  
797 dead cells with Zombie Nir. Data were acquired using the BD LSRFortessa flow cytometer (BD  
798 Biosciences). Data were analyzed with FlowJo software (Tree Star).

799

800 **Bulk tumor RNA-seq**

801  $5 \times 10^5$  WT B16-F10 cells were implanted intradermally into right and left flanks of WT  
802 C57BL/6J or age-matched STING<sup>Gt/Gt</sup> mice. At 7 days after implantation, the tumors were in-  
803 jected with  $4 \times 10^7$  PFU of rMVA or PBS. Tumors were harvested 1 day after injection and pro-  
804 cessed into single cell suspension as described previously. RNA was extracted from whole-cell  
805 lysates with RNeasy Plus Mini kit (Qiagen, Hilden, Germany) for RNA-seq.  
806 Library prep and sequencing: Following RNA isolation, total RNA integrity was checked using a  
807 2100 Bioanalyzer (Agilent Technologies, Santa Clara, CA). RNA concentrations were measured

808 using the NanoDrop system (Thermo Fisher Scientific, Inc., Waltham, MA). Preparation of RNA  
809 sample library and RNA-seq were performed by the Genomics Core Laboratory at Weill Cornell  
810 Medicine. Messenger RNA was prepared using TruSeq Stranded mRNA Sample Library Prepa-  
811 ration kit (Illumina, San Diego, CA), according to the manufacturer's instructions. The normal-  
812 ized cDNA libraries were pooled and sequenced on Illumina NovaSeq6000 sequencer with pair-  
813 end 50 cycles.

814

### 815 **Treg RNA-seq**

816  $5 \times 10^5$  WT B16-F10 cells were implanted intradermally into right and left flanks of Foxp3<sup>GFP</sup>  
817 mice. When tumor diameter reached 5 mm, mice were euthanized, and tumors and spleens were  
818 harvested and processed into single cell suspension as described before. CD4<sup>+</sup>GFP<sup>+</sup>OX40<sup>hi</sup> and  
819 CD4<sup>+</sup>GFP<sup>+</sup>OX40<sup>low</sup> populations from tumors and spleens were purified by FACS sorting. RNA  
820 was extracted with RNeasy Plus Micro kit (Qiagen). Following RNA isolation, total RNA integ-  
821 rity was checked using a 2100 Bioanalyzer (Agilent Technologies, Santa Clara, CA). RNA con-  
822 centrations were measured using the NanoDrop system (Thermo Fisher Scientific, Inc., Wal-  
823 tham, MA). The cDNA synthesis and amplification were performed by SMART-Seq v4 ultra  
824 low input RNA kit (Takara Bio USA, Mountain View, CA, USA) starting with less than 1 ng of  
825 total RNA from each sample. 150 pg of qualified full-length double strand cDNA was used and  
826 processed to Illumina library construction with the Nextera XT DNA Library Preparation Kits  
827 (Illumina, San Diego, CA). Then the normalized cDNA libraries were pooled and sequenced on  
828 Illumina NovaSeq6000 sequencer with pair-end 50 cycles.

829

### 830 **RNA-seq data analysis**

831 The raw sequencing reads in BCL format were processed through bcl2fastq 2.19 (Illumina) for  
832 FASTQ conversion and demultiplexing. After trimming the adaptors with cutadapt (ver-  
833 sion1.18)( <https://cutadapt.readthedocs.io/en/v1.18/>), RNA reads were aligned and mapped to  
834 the GRCh38 human reference genome by STAR (Version2.5.2)  
835 (<https://github.com/alexdobin/STAR>) (Dobin et al., 2013), and transcriptome reconstruction was  
836 performed by Cufflinks (Version 2.1.1) (<http://cole-trapnell-lab.github.io/cufflinks/>). The abun-  
837 dance of transcripts was measured with Cufflinks in Fragments Per Kilobase of exon model per  
838 Million mapped reads (FPKM) (Trapnell et al., 2013; Trapnell et al., 2010). Gene expression

839 profiles were constructed for differential expression, cluster, and principle component anal-  
840 yses with the DESeq2 package ([https://bioconductor.org/packages/re-](https://bioconductor.org/packages/release/bioc/html/DESeq2.html)  
841 lease/bioc/html/DESeq2.html) (Love et al., 2014). For differential expression analysis, pairwise  
842 comparisons between two or more groups using parametric tests where read-counts follow a neg-  
843 ative binomial distribution with a gene-specific dispersion parameter. Corrected p-values were  
844 calculated based on the Benjamini-Hochberg method to adjusted for multiple testing.

845 The GSEA analysis was done using GSEA software version 4.0.3 (Subramanian et al., 2005)  
846 from the Broad Institute(<http://www.gsea-msigdb.org/gsea/index.jsp>), which uses predefined  
847 gene sets from the Molecular Signatures Database (MSigDB v7.4) (Subramanian et al., 2005).  
848 We used the hallmark gene sets collection for the present study. Genes were ranked by the test  
849 statistic value obtained from differential expression analysis and the pre-ranked version of the  
850 tool was used to identify significantly enriched biological pathways. The minimum and maxi-  
851 mum criteria for selection of gene sets from the collection were 15 and 500 genes, respectively.

## 852 **Human tumor specimens**

853 Fresh biopsy samples from patients with Extramammary Paget's disease were obtained at the  
854 dermatology service in the Department of Medicine of Memorial Sloan Kettering Cancer Center.  
855 Written informed consents were obtained from patients enrolled in the protocol approved by Me-  
856 morial Sloan Kettering Cancer Center Institutional Review Board (IRB). Studies were conducted  
857 in accordance with National Institutes of Health and institutional guidelines for human subject  
858 research. Tumor tissues were cut into small pieces using a pair of fine scissors. They were in-  
859 fected with rhMVA or mock-infected. Cells were collected after 24 h and processed for FACS  
860 analyses.

## 862 **Statistical analysis**

863 Two-tailed unpaired Student's t test was used for comparisons of two groups in the studies. Sur-  
864 vival data were analyzed by log-rank (Mantel-Cox) test. The p values deemed significant are in-  
865 dicated in the figures as follows: \*,  $p < 0.05$ ; \*\*,  $p < 0.01$ ; \*\*\*,  $p < 0.001$ ; \*\*\*\*,  $p < 0.0001$ . The  
866 numbers of animals included in the study are discussed in each figure legend.

867

868

869 **Acknowledgements**

870 We thank Alexander Y. Rudensky for Foxp3<sup>gfp</sup> and Foxp3<sup>DTR</sup> mice. We thank the Flow Cytome-  
871 try Core Facility and Molecular Cytology Core Facility at the Sloan Kettering Institute and Ge-  
872 nomic Resources Core Facility at Weill Cornell Medical College. This work was supported by  
873 NIH grants K-08 AI073736 (L.D.), R56AI095692 (L.D.), R03 AR068118 (L.D.), R01 CA56821  
874 (J.D.W.), R01 AI091707 (C.M.R.), Charles H. Revson Senior Fellowship in Biomedical Science  
875 (J.M.L.), a Black Family Metastasis Center Fellowship (J.M.L.), Society of Memorial Sloan Ket-  
876 tering (MSK) research grant (L.D.), MSK Technology Development Fund (L.D.), Parker Insti-  
877 tute for Cancer Immunotherapy Career Development Award (L.D.), sponsored research agree-  
878 ment from IMVAQ Therapeutics (L.D.). This work was supported in part by the Swim across  
879 America (J.D.W., T.M.), Ludwig Institute for Cancer Research (J.D.W., T.M.), This research  
880 was also funded in part through the NIH/NCI Cancer Center Support Grant P30 CA008748.

881

882 **Author Contributions**

883 Author contributions: N.Y., Y.W. and L.D. were involved in all aspect of this study, including  
884 conceiving the project, designing and performing experiments, data analyses and interpretation,  
885 and manuscript writing. S.L. assisted some mouse experiments and human tumor ex vivo infection  
886 experiments and analyzed the data. G.M, J.W., W.Y. J.C. assisted with construct designs and viral  
887 engineering. J.M.L. analyzed RNA-seq data on regulatory T cells. A.Y.T. and T.Z. analyzed the  
888 bulk RNA-seq data from tumors. A.R. provided human tumor samples. J.D.W., T.M, C.M.R. and  
889 J.Z.X. assisted in experimental design, data interpretation, and manuscript preparation. All authors  
890 are involved in manuscript preparation. L.D. provided overall supervision of the study.

891

892 **Competing interests**

893 Memorial Sloan Kettering Cancer Center filed a patent application for the use of recombinant  
894 MVAΔE5R-Flt3L-OX40L as monotherapy or in combination with immune checkpoint blockade  
895 for solid tumors. L.D., J.D.W., T.M., N.Y. Y.W. are authors on the patent, which has been li-  
896 censed to IMVAQ Therapeutics. L.D., J.D.W., T.M., W.Y., J.C., N.Y. are co-founders of  
897 IMVAQ Therapeutics and C.M.R. is a member of the scientific advisory board of IMVAQ Ther-  
898 apeutics. T.M. is a consultant of Immunos Therapeutics and Pfizer. He has research support from  
899 Bristol Myers Squibb; Surface Oncology; Kyn Therapeutics; Infinity Pharmaceuticals, Inc.;

900 Peregrine Pharmaceuticals, Inc.; Adaptive Biotechnologies; Leap Therapeutics, Inc.; and Aprea.  
901 He has patents on applications related to work on oncolytic viral therapy, alpha virus-based vac-  
902 cine, neoantigen modeling, CD40, GITR, OX40, PD-1, and CTLA-4. J.D.W. is a consultant for  
903 Adaptive Biotech, Advaxis, Am-gen, Apricity, Array BioPharma, Ascentage Pharma, Astellas,  
904 Bayer, Beigene, Bristol Myers Squibb, Celgene, Chugai, Elucida, Eli Lilly, F Star, Genentech,  
905 Imvqa, Janssen, Kleo Pharma, Linnaeus, MedImmune, Merck, Neon Therapeutics, Ono, Polaris  
906 Pharma, Polynoma, Psioxus, Puretech, Recepta, Trieza, Sellas Life Sciences, Seramatrix, Surface  
907 Oncology, and Syndax. Research support: Bristol Myers Squibb, Medimmune, Merck Pharma-  
908 ceuticals, and Genentech. Equity: Potenza Therapeutics, Tizona Pharmaceuticals, Adaptive Bio-  
909 technologies, Elucida, Imvqa, Beigene, Trieza, and Linnaeus. Honorarium: Esanex. Patents: xe-  
910 nogeneic DNA vaccines, alphavirus replicon particles ex-pressing TRP2, MDSC assay, Newcas-  
911 tle disease viruses for cancer therapy, genomic signature to identify responders to ipilimumab in  
912 melanoma, engineered vaccinia viruses for cancer immunotherapy, anti-CD40 agonist mono-  
913 clonal antibody (mAb) fused to monophosphoryl lipid A (MPL) for cancer therapy, CAR T cells  
914 targeting differentiation antigens as means to treat cancer, anti-PD-1 antibody, anti-CTLA-4 anti-  
915 bodies, and anti-GITR antibodies and methods of use thereof.  
916



917 **REFERENCES**

918

919 Barsheshet, Y., Wildbaum, G., Levy, E., Vitenshtein, A., Akinseye, C., Griggs, J., Lira, S.A., and  
920 Karin, N. (2017). CCR8(+)*FOXP3*(+) Treg cells as master drivers of immune regulation. *Proc Natl*  
921 *Acad Sci U S A* *114*, 6086-6091.

922

923 Bommareddy, P.K., Shettigar, M., and Kaufman, H.L. (2018). Integrating oncolytic viruses in  
924 combination cancer immunotherapy. *Nat Rev Immunol* *18*, 498-513.

925

926 Chesney, J., Puzanov, I., Collichio, F., Singh, P., Milhem, M.M., Glaspy, J., Hamid, O., Ross, M.,  
927 Friedlander, P., Garbe, C., *et al.* (2018). Randomized, Open-Label Phase II Study Evaluating the  
928 Efficacy and Safety of Talimogene Laherparepvec in Combination With Ipilimumab Versus  
929 Ipilimumab Alone in Patients With Advanced, Unresectable Melanoma. *J Clin Oncol* *36*, 1658-  
930 1667.

931

932 Chinen, T., Kannan, A.K., Levine, A.G., Fan, X., Klein, U., Zheng, Y., Gasteiger, G., Feng, Y.,  
933 Fontenot, J.D., and Rudensky, A.Y. (2016). An essential role for the IL-2 receptor in Treg cell  
934 function. *Nat Immunol* *17*, 1322-1333.

935

936 Coghill, J.M., Fowler, K.A., West, M.L., Fulton, L.M., van Deventer, H., McKinnon, K.P., Vincent,  
937 B.G., Lin, K., Panoskaltis-Mortari, A., Cook, D.N., *et al.* (2013). CC chemokine receptor 8  
938 potentiates donor Treg survival and is critical for the prevention of murine graft-versus-host  
939 disease. *Blood* *122*, 825-836.

940

941 Cohen, A.D., Schaer, D.A., Liu, C., Li, Y., Hirschhorn-Cymerman, D., Kim, S.C., Diab, A., Rizzuto,  
942 G., Duan, F., Perales, M.A., *et al.* (2010). Agonist anti-GITR monoclonal antibody induces  
943 melanoma tumor immunity in mice by altering regulatory T cell stability and intra-tumor  
944 accumulation. *PLoS One* *5*, e10436.

945

946 Croft, M. (2009). The role of TNF superfamily members in T-cell function and diseases. *Nat Rev*  
947 *Immunol* *9*, 271-285.

948

949 Croft, M., So, T., Duan, W., and Soroosh, P. (2009). The significance of OX40 and OX40L to T-cell  
950 biology and immune disease. *Immunol Rev* *229*, 173-191.

951

952 Dai, P., Wang, W., Cao, H., Avogadri, F., Dai, L., Drexler, I., Joyce, J.A., Li, X.D., Chen, Z.,  
953 Merghoub, T., *et al.* (2014). Modified vaccinia virus Ankara triggers type I IFN production in  
954 murine conventional dendritic cells via a cGAS/STING-mediated cytosolic DNA-sensing pathway.  
955 *PLoS Pathog* *10*, e1003989.

956

957 Dai, P., Wang, W., Yang, N., Serna-Tamayo, C., Ricca, J.M., Zamarin, D., Shuman, S., Merghoub,  
958 T., Wolchok, J.D., and Deng, L. (2017). Intratumoral delivery of inactivated modified vaccinia

- 959 virus Ankara (iMVA) induces systemic antitumor immunity via STING and Batf3-dependent  
960 dendritic cells. *Sci Immunol* 2.
- 961
- 962 Davola, M.E., and Mossman, K.L. (2019). Oncolytic viruses: how "lytic" must they be for  
963 therapeutic efficacy? *Oncoimmunology* 8, e1581528.
- 964
- 965 Deng, L., Liang, H., Xu, M., Yang, X., Burnette, B., Arina, A., Li, X.D., Mauceri, H., Beckett, M.,  
966 Darga, T., *et al.* (2014). STING-Dependent Cytosolic DNA Sensing Promotes Radiation-Induced  
967 Type I Interferon-Dependent Antitumor Immunity in Immunogenic Tumors. *Immunity* 41, 843-  
968 852.
- 969
- 970 Dobin, A., Davis, C.A., Schlesinger, F., Drenkow, J., Zaleski, C., Jha, S., Batut, P., Chaisson, M.,  
971 and Gingeras, T.R. (2013). STAR: ultrafast universal RNA-seq aligner. *Bioinformatics* 29, 15-21.
- 972 Field, C.S., Baixauli, F., Kyle, R.L., Puleston, D.J., Cameron, A.M., Sanin, D.E., Hippen, K.L., Loschi,  
973 M., Thangavelu, G., Corrado, M., *et al.* (2020). Mitochondrial Integrity Regulated by Lipid  
974 Metabolism Is a Cell-Intrinsic Checkpoint for Treg Suppressive Function. *Cell Metab* 31, 422-437  
975 e425.
- 976
- 977 Gilbert, S.C. (2013). Clinical development of Modified Vaccinia virus Ankara vaccines. *Vaccine*  
978 31, 4241-4246.
- 979
- 980 He, N., Fan, W., Henriquez, B., Yu, R.T., Atkins, A.R., Liddle, C., Zheng, Y., Downes, M., and  
981 Evans, R.M. (2017). Metabolic control of regulatory T cell (Treg) survival and function by Lkb1.  
982 *Proc Natl Acad Sci U S A* 114, 12542-12547.
- 983
- 984 Hirschhorn-Cymerman, D., Budhu, S., Kitano, S., Liu, C., Zhao, F., Zhong, H., Lesokhin, A.M.,  
985 Avogadri-Connors, F., Yuan, J., Li, Y., *et al.* (2012). Induction of tumoricidal function in CD4+ T  
986 cells is associated with concomitant memory and terminally differentiated phenotype. *J Exp*  
987 *Med* 209, 2113-2126.
- 988
- 989 Hirschhorn-Cymerman, D., Rizzuto, G.A., Merghoub, T., Cohen, A.D., Avogadri, F., Lesokhin,  
990 A.M., Weinberg, A.D., Wolchok, J.D., and Houghton, A.N. (2009). OX40 engagement and  
991 chemotherapy combination provides potent antitumor immunity with concomitant regulatory T  
992 cell apoptosis. *J Exp Med* 206, 1103-1116.
- 993
- 994 Kohlmeier, J.E., Cookenham, T., Roberts, A.D., Miller, S.C., and Woodland, D.L. (2010). Type I  
995 interferons regulate cytolytic activity of memory CD8(+) T cells in the lung airways during  
996 respiratory virus challenge. *Immunity* 33, 96-105.
- 997
- 998 Lemos de Matos, A., Franco, L.S., and McFadden, G. (2020). Oncolytic Viruses and the Immune  
999 System: The Dynamic Duo. *Mol Ther Methods Clin Dev* 17, 349-358.
- 1000
- 1001 Leone, R.D., Sun, I.M., Oh, M.H., Sun, I.H., Wen, J., Englert, J., and Powell, J.D. (2018). Inhibition  
1002 of the adenosine A2a receptor modulates expression of T cell coinhibitory receptors and

1003 improves effector function for enhanced checkpoint blockade and ACT in murine cancer  
1004 models. *Cancer Immunol Immunother* 67, 1271-1284.

1005

1006 Liu, K., and Nussenzweig, M.C. (2010). Origin and development of dendritic cells. *Immunol Rev*  
1007 234, 45-54.

1008

1009 Liu, R., Americo, J.L., Cotter, C.A., Earl, P.L., Erez, N., Peng, C., and Moss, B. (2021). One or two  
1010 injections of MVA-vectored vaccine shields hACE2 transgenic mice from SARS-CoV-2 upper and  
1011 lower respiratory tract infection. *Proc Natl Acad Sci U S A* 118.

1012

1013 Love, M.I., Huber, W., and Anders, S. (2014). Moderated estimation of fold change and  
1014 dispersion for RNA-seq data with DESeq2. *Genome Biol* 15, 550.

1015

1016 Maj, T., Wang, W., Crespo, J., Zhang, H., Wang, W., Wei, S., Zhao, L., Vatan, L., Shao, I., Szeliga,  
1017 W., *et al.* (2017). Oxidative stress controls regulatory T cell apoptosis and suppressor activity  
1018 and PD-L1-blockade resistance in tumor. *Nat Immunol* 18, 1332-1341.

1019

1020 Marabelle, A., Kohrt, H., Sagiv-Barfi, I., Ajami, B., Axtell, R.C., Zhou, G., Rajapaksa, R., Green,  
1021 M.R., Torchia, J., Brody, J., *et al.* (2013). Depleting tumor-specific Tregs at a single site  
1022 eradicates disseminated tumors. *J Clin Invest* 123, 2447-2463.

1023

1024 Messenheimer, D.J., Jensen, S.M., Afentoulis, M.E., Wegmann, K.W., Feng, Z., Friedman, D.J.,  
1025 Gough, M.J., Urba, W.J., and Fox, B.A. (2017). Timing of PD-1 Blockade Is Critical to Effective  
1026 Combination Immunotherapy with Anti-OX40. *Clin Cancer Res* 23, 6165-6177.

1027

1028 Murata, K., Ishii, N., Takano, H., Miura, S., Ndhlovu, L.C., Nose, M., Noda, T., and Sugamura, K.  
1029 (2000). Impairment of antigen-presenting cell function in mice lacking expression of OX40  
1030 ligand. *J Exp Med* 191, 365-374.

1031

1032 Plitas, G., Konopacki, C., Wu, K., Bos, P.D., Morrow, M., Putintseva, E.V., Chudakov, D.M., and  
1033 Rudensky, A.Y. (2016). Regulatory T Cells Exhibit Distinct Features in Human Breast Cancer.  
1034 *Immunity* 45, 1122-1134.

1035

1036 Ribas, A., Dummer, R., Puzanov, I., VanderWalde, A., Andtbacka, R.H.I., Michielin, O., Olszanski,  
1037 A.J., Malvey, J., Cebon, J., Fernandez, E., *et al.* (2018). Oncolytic Virotherapy Promotes  
1038 Intratumoral T Cell Infiltration and Improves Anti-PD-1 Immunotherapy. *Cell* 174, 1031-1032.

1039 Ribas, A., and Wolchok, J.D. (2018). Cancer immunotherapy using checkpoint blockade. *Science*  
1040 359, 1350-1355.

1041

1042 Russell, S.J., Peng, K.W., and Bell, J.C. (2012). Oncolytic virotherapy. *Nat Biotechnol* 30, 658-670.

1043

1044 Sauer, J.D., Sotelo-Troha, K., von Moltke, J., Monroe, K.M., Rae, C.S., Brubaker, S.W., Hyodo, M.,  
1045 Hayakawa, Y., Woodward, J.J., Portnoy, D.A., *et al.* (2011). The N-ethyl-N-nitrosourea-induced

- 1046 Goldenticket mouse mutant reveals an essential function of Sting in the in vivo interferon  
1047 response to *Listeria monocytogenes* and cyclic dinucleotides. *Infect Immun* **79**, 688-694.  
1048
- 1049 Schreiber, R.D., Old, L.J., and Smyth, M.J. (2011). Cancer immunoediting: integrating immunity's  
1050 roles in cancer suppression and promotion. *Science* **331**, 1565-1570.  
1051
- 1052 Shrimali, R.K., Ahmad, S., Verma, V., Zeng, P., Ananth, S., Gaur, P., Gittelman, R.M., Yusko, E.,  
1053 Sanders, C., Robins, H., *et al.* (2017). Concurrent PD-1 Blockade Negates the Effects of OX40  
1054 Agonist Antibody in Combination Immunotherapy through Inducing T-cell Apoptosis. *Cancer*  
1055 *Immunol Res* **5**, 755-766.  
1056
- 1057 Subramanian, A., Tamayo, P., Mootha, V.K., Mukherjee, S., Ebert, B.L., Gillette, M.A., Paulovich,  
1058 A., Pomeroy, S.L., Golub, T.R., Lander, E.S., *et al.* (2005). Gene set enrichment analysis: a  
1059 knowledge-based approach for interpreting genome-wide expression profiles. *Proc Natl Acad*  
1060 *Sci U S A* **102**, 15545-15550.  
1061
- 1062 Trapnell, C., Hendrickson, D.G., Sauvageau, M., Goff, L., Rinn, J.L., and Pachter, L. (2013).  
1063 Differential analysis of gene regulation at transcript resolution with RNA-seq. *Nat Biotechnol*  
1064 **31**, 46-53.  
1065
- 1066 Trapnell, C., Williams, B.A., Pertea, G., Mortazavi, A., Kwan, G., van Baren, M.J., Salzberg, S.L.,  
1067 Wold, B.J., and Pachter, L. (2010). Transcript assembly and quantification by RNA-Seq reveals  
1068 unannotated transcripts and isoform switching during cell differentiation. *Nat Biotechnol* **28**,  
1069 511-515.  
1070
- 1071 Villarreal, D.O., L'Huillier, A., Armington, S., Mottershead, C., Filippova, E.V., Coder, B.D., Petit,  
1072 R.G., and Princiotta, M.F. (2018). Targeting CCR8 Induces Protective Antitumor Immunity and  
1073 Enhances Vaccine-Induced Responses in Colon Cancer. *Cancer Res* **78**, 5340-5348.  
1074
- 1075 Volz, A., and Sutter, G. (2017). Modified Vaccinia Virus Ankara: History, Value in Basic Research,  
1076 and Current Perspectives for Vaccine Development. *Adv Virus Res* **97**, 187-243.  
1077
- 1078 Wang, W., Liu, S., Dai, P., Yang, N., Wang, Y., Giese, R.A., Merghoub, T., Wolchok, J., and Deng,  
1079 L. (2021). Elucidating mechanisms of antitumor immunity mediated by live oncolytic vaccinia  
1080 and heat-inactivated vaccinia. *J Immunother Cancer* **9**.  
1081
- 1082 Wei, S.C., Duffy, C.R., and Allison, J.P. (2018). Fundamental Mechanisms of Immune Checkpoint  
1083 Blockade Therapy. *Cancer Discov* **8**, 1069-1086.  
1084
- 1085 Weinberg, S.E., Singer, B.D., Steinert, E.M., Martinez, C.A., Mehta, M.M., Martinez-Reyes, I.,  
1086 Gao, P., Helmin, K.A., Abdala-Valencia, H., Sena, L.A., *et al.* (2019). Mitochondrial complex III is  
1087 essential for suppressive function of regulatory T cells. *Nature* **565**, 495-499.

- 1088 Wing, K., Onishi, Y., Prieto-Martin, P., Yamaguchi, T., Miyara, M., Fehervari, Z., Nomura, T., and  
1089 Sakaguchi, S. (2008). CTLA-4 control over Foxp3+ regulatory T cell function. *Science* 322, 271-  
1090 275.
- 1091
- 1092 Woo, S.R., Fuertes, M.B., Corrales, L., Spranger, S., Furdyna, M.J., Leung, M.Y., Duggan, R.,  
1093 Wang, Y., Barber, G.N., Fitzgerald, K.A., *et al.* (2014). STING-dependent cytosolic DNA sensing  
1094 mediates innate immune recognition of immunogenic tumors. *Immunity* 41, 830-842.
- 1095
- 1096 Workenhe, S.T., and Mossman, K.L. (2014). Oncolytic virotherapy and immunogenic cancer cell  
1097 death: sharpening the sword for improved cancer treatment strategies. *Mol Ther* 22, 251-256.
- 1098
- 1099 Zamarin, D., Holmgaard, R.B., Subudhi, S.K., Park, J.S., Mansour, M., Palese, P., Merghoub, T.,  
1100 Wolchok, J.D., and Allison, J.P. (2014). Localized oncolytic virotherapy overcomes systemic  
1101 tumor resistance to immune checkpoint blockade immunotherapy. *Sci Transl Med* 6, 226ra232.
- 1102
- 1103 Zappasodi, R., Serganova, I., Cohen, I.J., Maeda, M., Shindo, M., Senbabaoglu, Y., Watson, M.J.,  
1104 Leftin, A., Maniyar, R., Verma, S., *et al.* (2021). CTLA-4 blockade drives loss of Treg stability in  
1105 glycolysis-low tumours. *Nature* 591, 652-658.
- 1106
- 1107 Zappasodi, R., Sirard, C., Li, Y., Budhu, S., Abu-Akeel, M., Liu, C., Yang, X., Zhong, H., Newman,  
1108 W., Qi, J., *et al.* (2019). Rational design of anti-GITR-based combination immunotherapy. *Nat*  
1109 *Med* 25, 759-766.
- 1110
- 1111 Zaretsky, J.M., Garcia-Diaz, A., Shin, D.S., Escuin-Ordinas, H., Hugo, W., Hu-Lieskovan, S.,  
1112 Torrejon, D.Y., Abril-Rodriguez, G., Sandoval, S., Barthly, L., *et al.* (2016). Mutations Associated  
1113 with Acquired Resistance to PD-1 Blockade in Melanoma. *N Engl J Med* 375, 819-829.
- 1114
- 1115 Zou, W., Wolchok, J.D., and Chen, L. (2016). PD-L1 (B7-H1) and PD-1 pathway blockade for  
1116 cancer therapy: Mechanisms, response biomarkers, and combinations. *Sci Transl Med* 8,  
1117 328rv324.
- 1118
- 1119 Yang, N., *et al.*, Vaccinia E5 is a major inhibitor of the DNA sensor cGAS. *BioRxiv*  
1120 <https://doi.org/10.1101/2021.10.25.465197>.
