# Supplementary material for: Intratumoral delivery of engineered recombinant modified vaccinia virus Ankara expressing Flt3L and OX40L generates potent antitumor immunity through activating the cGAS/STING pathway and depleting tumor-infiltrating regulatory T cells
Source: bioRxiv or medRxiv preprint supplement (doi:10.1101/2021.10.31.466698), 2021-11-01
Supplement: Supplementary file [file media-1.pdf]

## Supplementary Information

### Intratumoral delivery of engineered recombinant modified vaccinia virus Ankara expressing Flt3L and OX40L generates potent antitumor immunity through activating the cGAS/STING pathway and depleting tumor-infiltrating regulatory T cells

Ning Yang<sup>1#</sup>, Yi Wang<sup>1#</sup>, Shuaitong Liu<sup>1</sup>, Joseph M. Luna<sup>3</sup>, Gregory Mazo<sup>1</sup>, Adrian Tan<sup>4</sup>, Tuo Li<sup>4</sup>, Jiahu Wang<sup>5</sup>, Wei Yan<sup>6</sup>, John Choi<sup>6</sup>, Anthony Rossi<sup>1,2</sup>, Jenny Zhaoying Xiang<sup>4</sup>, Charles M. Rice<sup>3</sup>, Taha Merghoub<sup>2,7,8</sup>, Jedd D. Wolchok<sup>2,7,8</sup>, and Liang Deng<sup>1,2,8\*</sup>

<sup>1</sup>Dermatology Service, Department of Medicine, Memorial Sloan Kettering Cancer Center, New York, NY 10065, USA.

<sup>2</sup>Weill Cornell Medical College, New York, NY 10065

<sup>3</sup>The Laboratory of Virology and Infectious Disease, The Rockefeller University, New York, NY, 10065

<sup>4</sup>Genomic Resources Core Facility, Weill Cornell Medical College, New York, NY, 10065, USA

<sup>5</sup>Genvira Biosciences, Ottawa, ON K1V 1C1, Canada

<sup>6</sup>IMVAQ Therapeutics, Sammamish, WA, 98021, USA

<sup>7</sup>Immuno-oncology service, Human Oncology and Pathogenesis Program; Memorial Sloan Kettering Cancer Center, New York, NY 10065, USA

<sup>8</sup>Parker Institute for Cancer Immunotherapy, Memorial Sloan Kettering Cancer Center, New York, NY

\*corresponding author. Mailing address for Liang Deng: Dermatology Service, Department of Medicine, Memorial Sloan Kettering Cancer Center, 1275 York Ave., New York, NY 10065. Email: [dengl@mskcc.org](mailto:dengl@mskcc.org). # These two authors contributed equally to this work.

This file contains:

- Supplementary Figure 1
- Supplementary Figure 2
- Supplementary Figure 3
- Supplementary Figure 4
- Supplementary Figure 5
- Supplementary Figure 6
- Supplementary Table 1

**Figure S1**

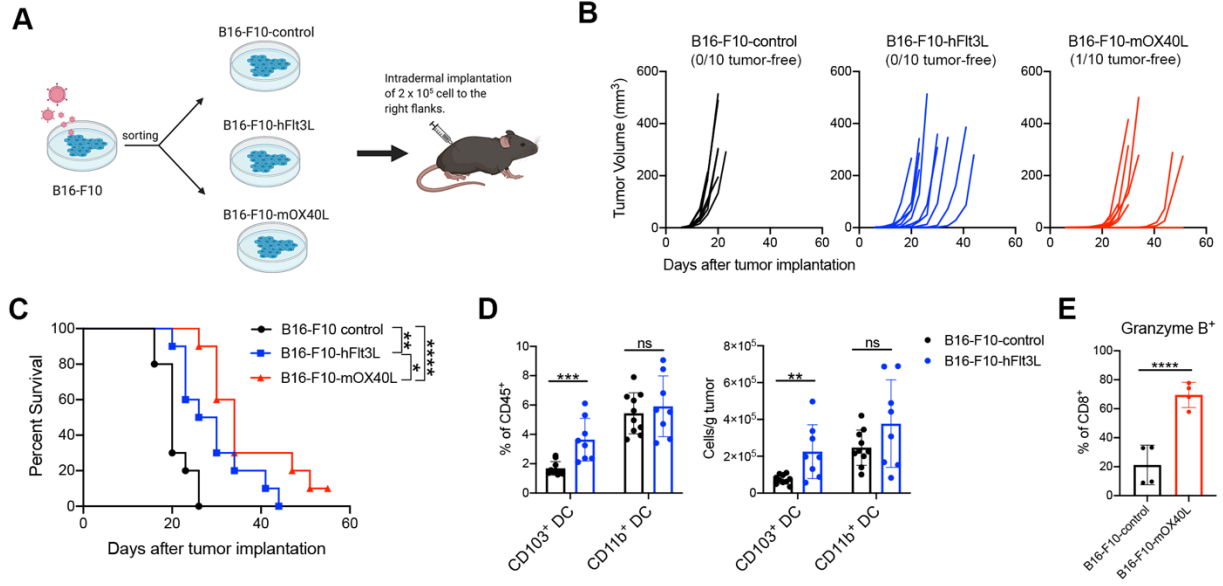

**Figure S1.** Overexpression of human Flt3L or murine OX40L on B16-F10 tumor cells enhances immunogenicity of the tumors.

(A) B16-F10 were transduced with retrovirus to generate hFlt3L or mOX40L-expressing stable cell lines. C57BL/6J mice were intradermally implanted with  $2 \times 10^5$  B16-F10-hFlt3L, B16-F10-mOX40L or B16-F10 control cells.

(B) Tumor growth curve ( $n=10$ ).

(C) Kaplan-Meier survival curve ( $n=10$ ;  $*P < 0.05$ ,  $**P < 0.01$ ,  $****P < 0.0001$ , *Mantel-Cox test*).

(D) Percentages and absolute number of CD103<sup>+</sup> DCs and CD11b<sup>+</sup> DCs in B16-F10-hFlt3L or B16-F10-control tumors. Data are means  $\pm$  SD ( $n=8$  or  $10$ ;  $**P < 0.01$ ,  $***P < 0.001$ , *t test*).

(E) Percentages Granzyme B<sup>+</sup> CD8<sup>+</sup> and Granzyme B<sup>+</sup> CD4<sup>+</sup> in B16-F10-hFlt3L or B16-F10-control tumors. Data are means  $\pm$  SD ( $n=4$ ;  $****P < 0.0001$ , *t test*).

**Figure S2**

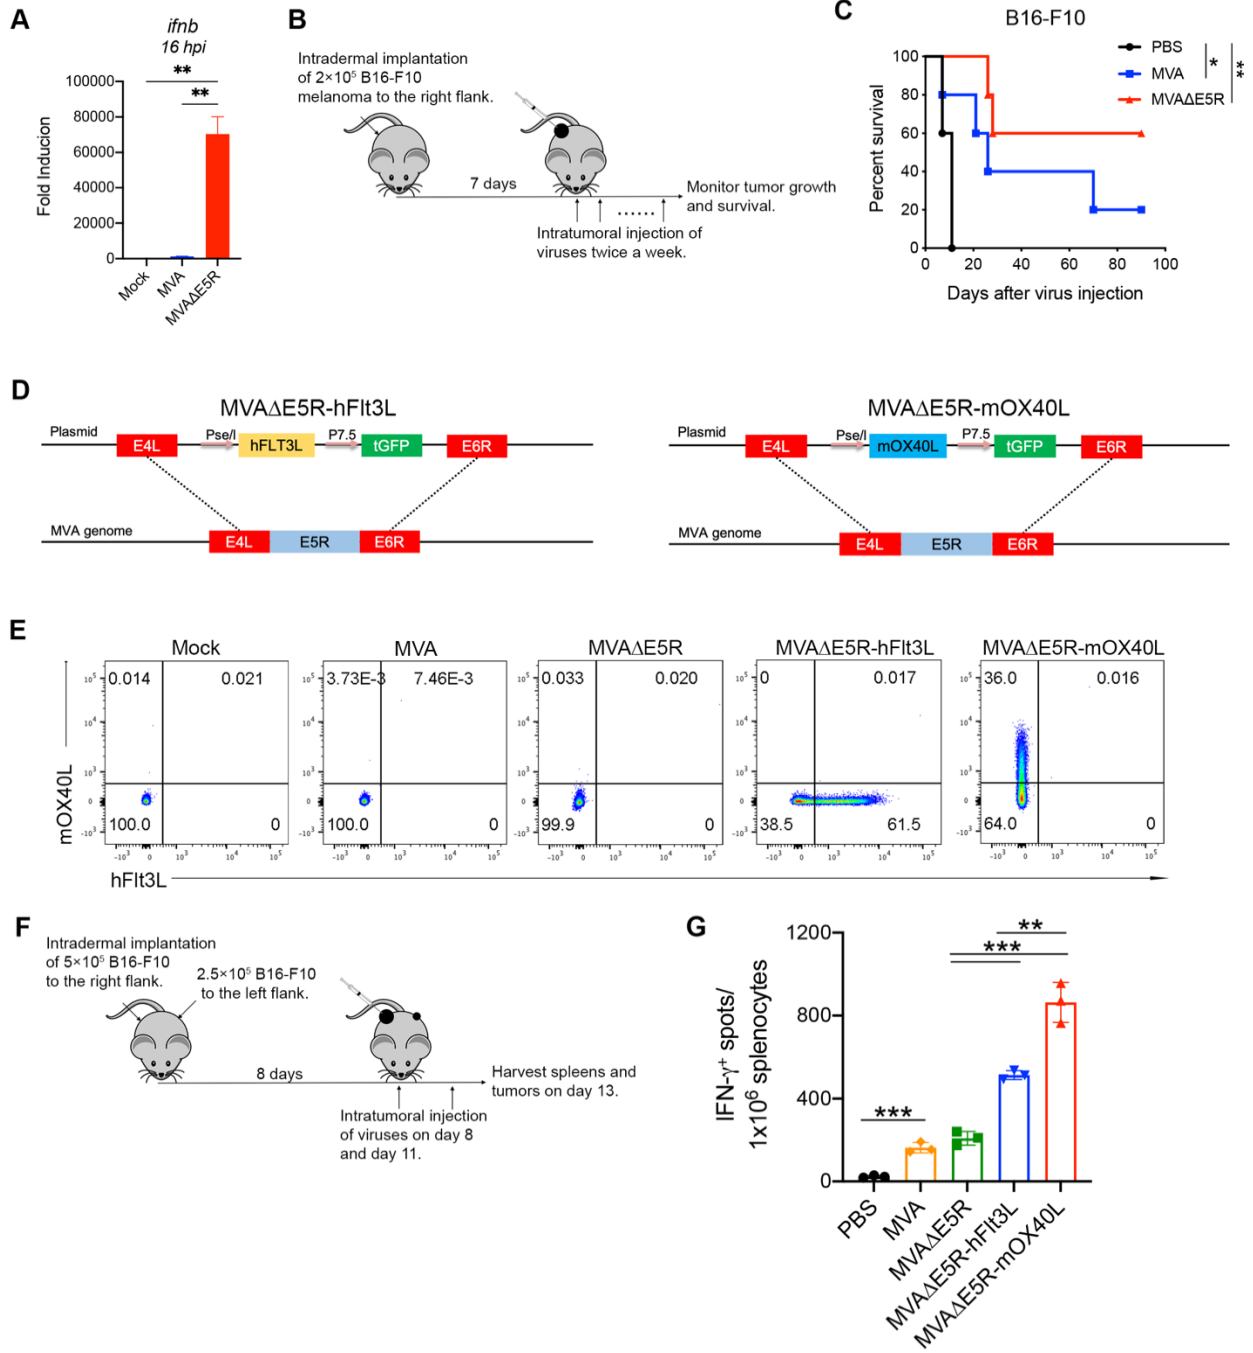

**Figure S2.** Incremental engineering of MVA with deletion of E5R gene and expression of human Flt3L or murine OX40L improves antitumor effects.

(A) Relative mRNA expression levels of *Ifnb* in BMDCs infected with MVA or MVA $\Delta$ E5R. Data are means  $\pm$  SD ( $n=3$ ;  $**P < 0.01$ , *t test*).

(B) Schematic diagram of IT MVA, MVA $\Delta$ E5R or PBS in a unilateral B16-F10 melanoma implantation model.

(C) Kaplan-Meier survival curve of mice treated with MVA, MVA $\Delta$ E5R or PBS in a unilateral B16-F10 implantation model ( $n=10$ ;  $*P < 0.05$ ,  $**P < 0.01$ , *Mantel-Cox test*).

(D) Schematic diagrams for the generation of MVA $\Delta$ E5R-hFlt3L or MVA $\Delta$ E5R-mOX40L through homologous recombination.

(D) Representative flow cytometry plots of expression of hFlt3L or mOX40L by MVA, MVA $\Delta$ E5R, MVA $\Delta$ E5R-hFlt3L, MVA $\Delta$ E5R-mOX40L or mock-infected BHK21 cells.

(E) Representative flow cytometry plots of expression of hFlt3L or mOX40L by MVA, MVA $\Delta$ E5R, MVA $\Delta$ E5R-hFlt3L, MVA $\Delta$ E5R-mOX40L or mock-infected BHK21 cells.

(F) Schematic diagram of IT MVA, MVA $\Delta$ E5R, MVA $\Delta$ E5R-hFlt3L, MVA $\Delta$ E5R-mOX40L or PBS in a bilateral B16-F10 melanoma implantation model.

(G) IFN- $\gamma^+$  splenocytes from MVA, MVA $\Delta$ E5R, MVA $\Delta$ E5R-hFlt3L, MVA $\Delta$ E5R-mOX40L or PBS-treated mice. Data are means  $\pm$  SD ( $n=3$ ;  $*P < 0.05$ ,  $***P < 0.001$ , *t test*).

**Figure S3**

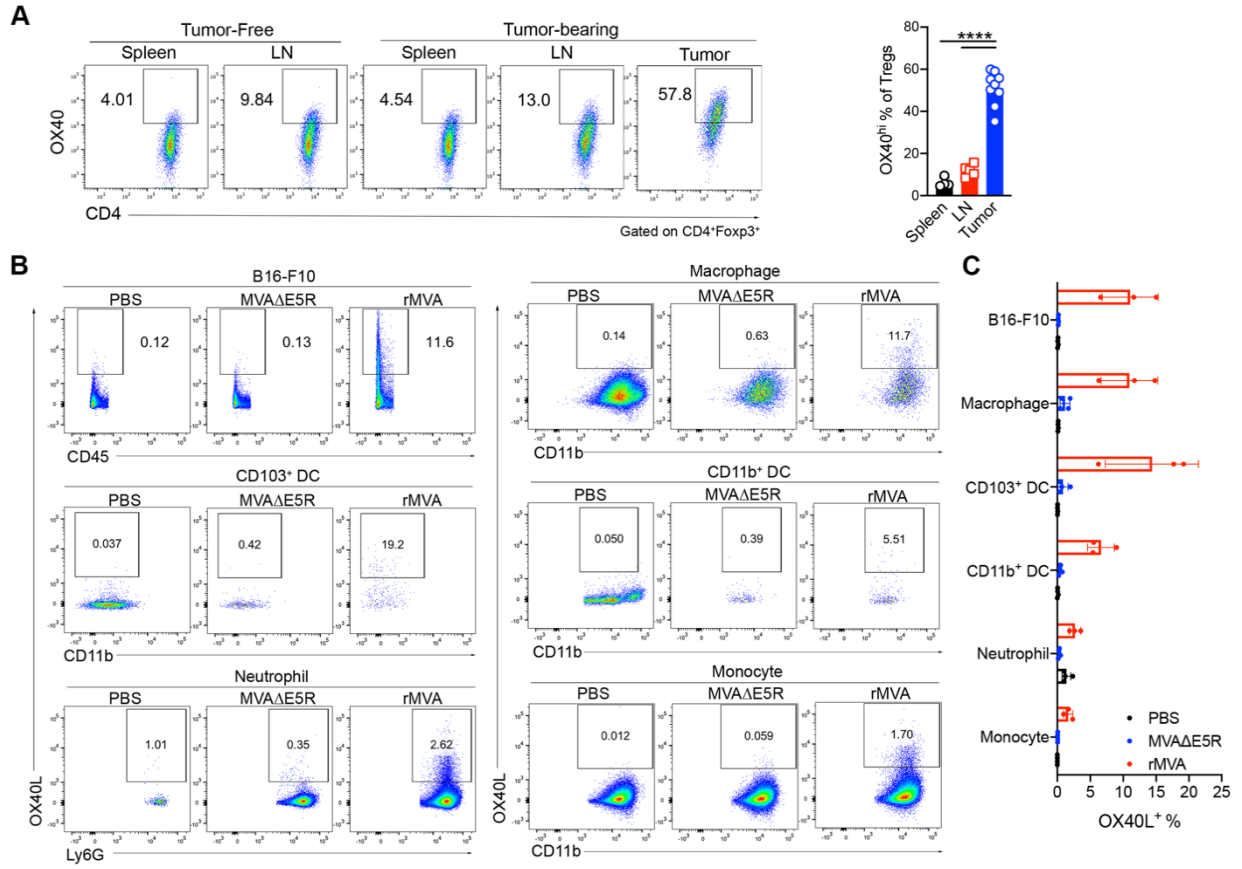

**Figure S3.** OX40 expression on T cells in lymphoid organs and in tumors and OX40L expression in tumors and tumor-infiltrating cells after IT rMVA.

(A) Representative flow cytometry plots of OX40 expression on CD4<sup>+</sup>Foxp3<sup>+</sup> T cells in the spleens, lymph nodes or tumors from naïve or B16-F10 tumor-bearing mice.

(B) Representative flow cytometry plots of OX40L expression on B16-F10 tumor cells or myeloid cells in the tumors injected with MVAΔE5R, rMVA or PBS as control.

(C) Percentages of OX40L<sup>+</sup> B16-F10 cells or myeloid cells in the tumors. Data are means ± SD ( $n=3\sim5$ ).

Figure S4

**A** OX40<sup>hi</sup> Tumor versus spleen  
Chemokines & receptors

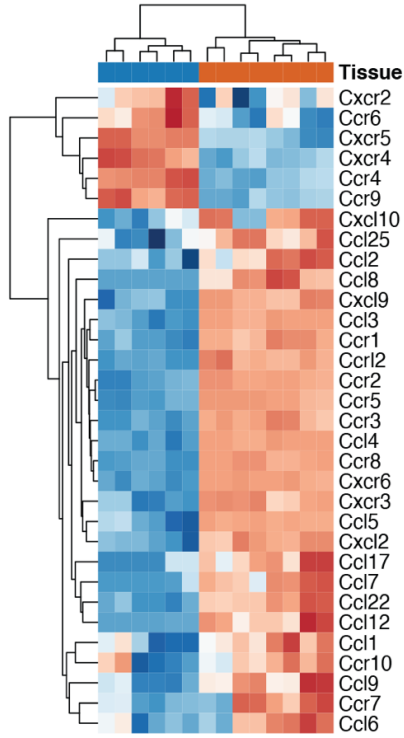

**B** OX40<sup>hi</sup> Tumor versus spleen  
Immune suppressors

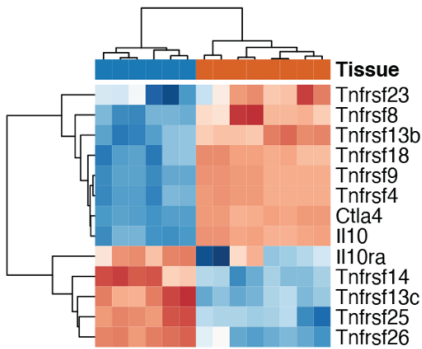

**C** OX40<sup>hi</sup> Tumor versus spleen  
GO Oxidative Phosphorylation

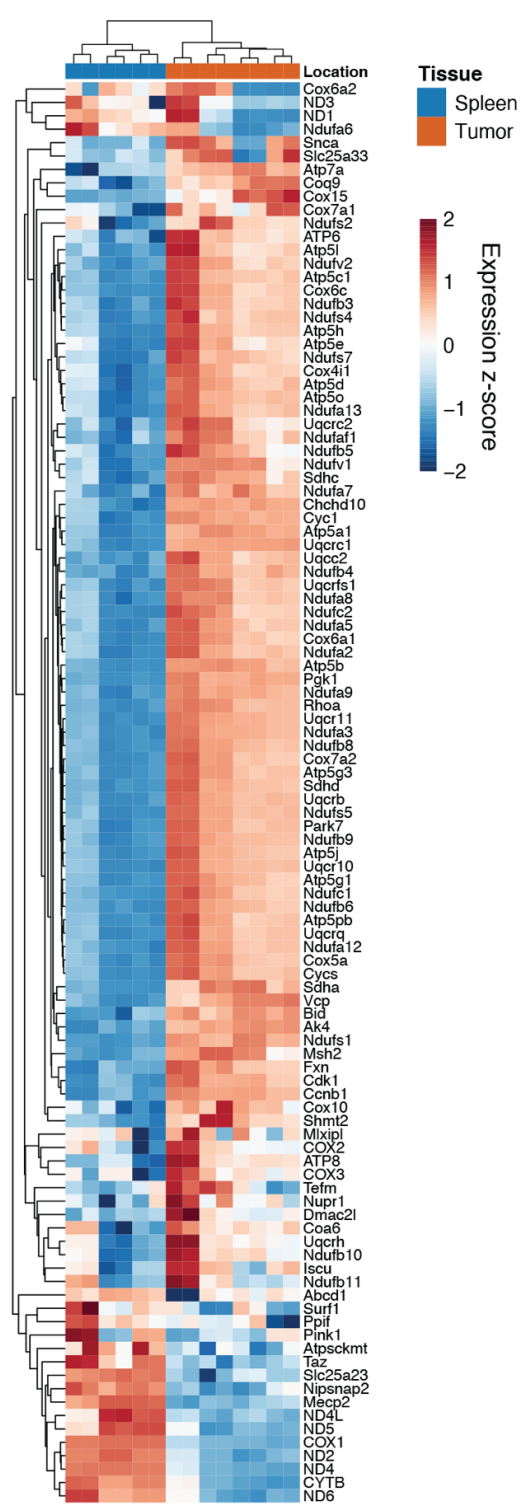



**Figure S4.** Heatmaps of differential gene expression in OX40<sup>hi</sup> Tregs isolated from tumors vs. those from spleens.

- (A) Differential gene expression of chemokines and chemokine receptors
- (B) Differential gene expression of immune suppressive genes
- (C) Differential gene expression of genes involved in oxidative phosphorylation.

**Figure S5**

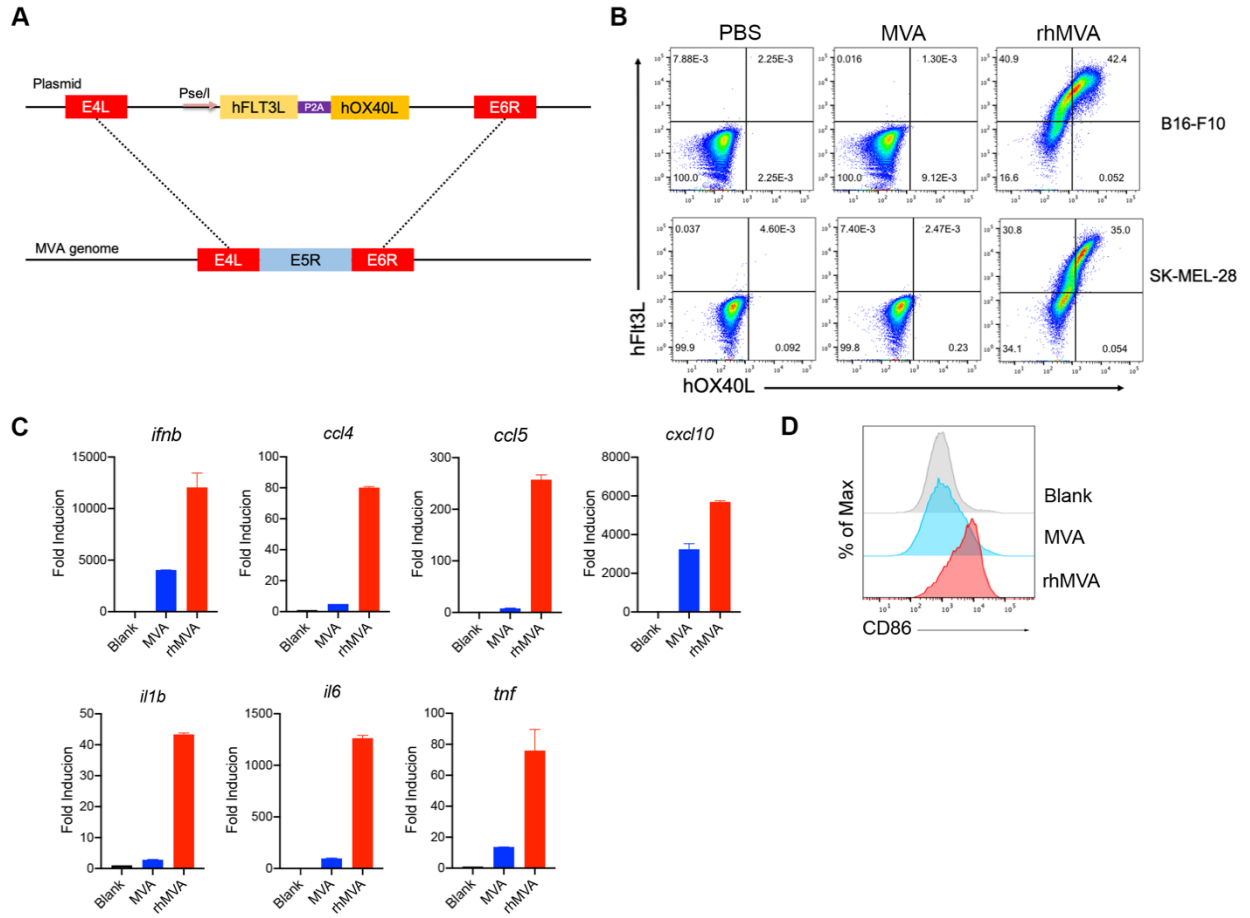

**Figure S5. Clinical candidate rhMVA induces innate immunity and promotes maturation of human monocyte-derived DCs (moDCs).**

- (A) Schematic diagram for the generation of rhMVA through homologous recombination.
- (B) Representative flow cytometry plots of expression of hFlt3L or hOX40L by rMVA-infected B16-F10 cells and SK-MEL-28 cells.
- (C) Relative mRNA expression levels of *ifnb*, *ccl4*, *ccl5*, *cxcl10*, *il1b*, *il6* and *tnf* in moDCs infected with MVA or rhMVA.
- (D) Mean fluorescence intensity of CD86 expressed by MoDCs infected with MVA or rhMVA.

Figure S6

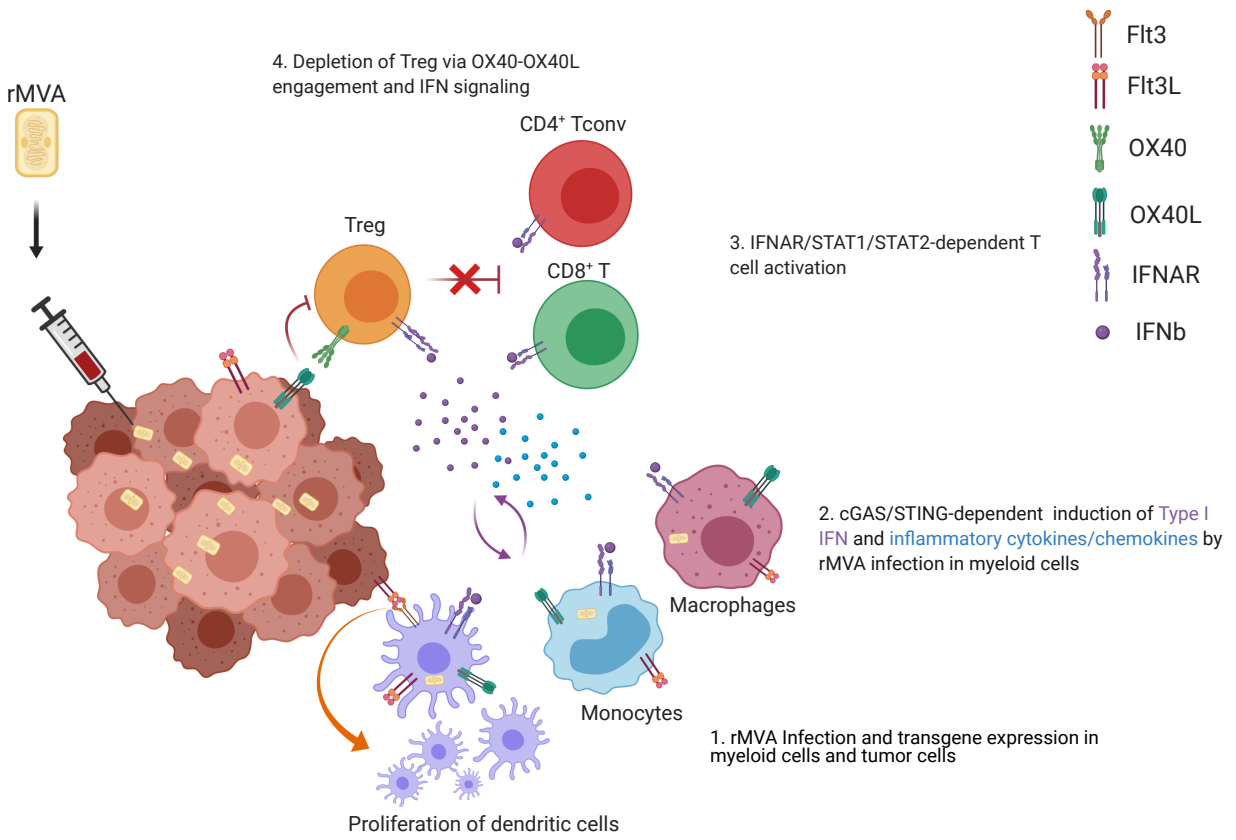

**Figure S6. Working model.** IT injection of rMVA results in the infection of tumor-infiltrating myeloid cells, including macrophages, monocytes, and dendritic cells, as well as tumor cells. This leads to the activation of cGAS/STING-mediated cytosolic DNA-sensing pathway and the production of type I IFN and cytokines and chemokines that are important for CD8<sup>+</sup> and CD4<sup>+</sup> T cell proliferation and activation (as indicated by Granzyme B, TNF, and IFN- $\gamma$  expression). Flt3L expression of the tumor microenvironment facilitates the proliferation of CD103<sup>+</sup> DCs in the tumors. OX40L expression by myeloid cell populations and tumor cells results in the depletion of OX40<sup>hi</sup> Tregs infiltrating the tumors via OX40L-OX40 ligation, which is promoted by type I IFN. This leads to the blunting of their inhibition on tumor-specific effector CD4<sup>+</sup> and CD8<sup>+</sup> T cells. Taken together, IT delivery of rMVA results in the alteration of tumor immunosuppressive microenvironment through activation of innate immunity and boosting of antitumor T cells by depletion of OX40<sup>hi</sup> regulatory T cells.

**Table S1.** Primers for Real-time PCR

| Species | Gene   | Direction | Sequence                        |
|---------|--------|-----------|---------------------------------|
| Mouse   | ccl4   | Forward   | 5'-GCCCTCTCTCTCCTCTTGCT-3'      |
|         | ccl4   | Reverse   | 5'-CTGGTCTCATAGTAATCCATC-3'     |
|         | ccl5   | Forward   | 5'-GCCACGTCAAGGAGTATTTCTA-3'    |
|         | ccl5   | Reverse   | 5'-ACACACTTGGCGGTTCCCTTC-3'     |
|         | cxcl10 | Forward   | 5'-GTCAGGTTGCCTCTGTCTCA-3'      |
|         | cxcl10 | Reverse   | 5'-TCAGGGAAGAGTCTGGAAAG-3'      |
|         | cxcl9  | Forward   | 5'-GGAACCCTAGTGATAAGGAATGCA-3'  |
|         | cxcl9  | Reverse   | 5'-TGAGGTCTTTGAGGGATTTGTAGTG-3' |
|         | ifna   | Forward   | 5'-CCTGTGTGATGCAGGAACC-3'       |
|         | ifna   | Reverse   | 5'-TCACCTCCCAGGCACAGA-3'        |
|         | ifnb   | Forward   | 5'-TGGAGATGACGGAGAAGATG-3'      |
|         | ifnb   | Reverse   | 5'-TTGGATGGCAAAGGCAGT-3'        |
|         | GAPDH  | Forward   | 5'-ATCAAGAAGGTGGTGAAGCA-3'      |
|         | GAPDH  | Reverse   | 5'-AGACAACCTGGTCCTCAGTGT-3'     |
|         | ccl4   | Forward   | 5'-AAAACCTCTTTGCCACCAATACC-3'   |
|         | ccl4   | Reverse   | 5'-GAGAGCAGAAGGCAGCTACTAG-3'    |
| Human   | cxcl10 | Forward   | 5'-ATTTGCTGCCTTATCTTTCTG-3'     |
|         | cxcl10 | Reverse   | 5'-TCTCACCTTCTTTTTTCATTGTAG-3'  |
|         | ifnb   | Forward   | 5'-GCACTGGCTGGAATGAGACT-3'      |
|         | ifnb   | Reverse   | 5'-CCTTGGCCTTCAGGTAATG-3'       |
|         | il6    | Forward   | 5'-AATTCGGTACATCCTCGACGG-3'     |
|         | il6    | Reverse   | 5'-TTGGAAGGTTTCAGGTTGTTTTCT-3'  |
|         | tnf    | Forward   | 5'-AATAGGCTGTTCCCATGTAGC-3'     |
|         | tnf    | Reverse   | 5'-AGAGGCTCAGCAATGAGTGA-3'      |
|         | GAPDH  | Forward   | 5'-ATCAAGAAGGTGGTGAAGCA-3'      |
|         | GAPDH  | Reverse   | 5'-GTCGCTGTTGAAGTCAGAGGA-3'     |
